# Supplementary material for: Controlling optoelectronic properties through protonation with π-extended triphenodioxazine diimides
Source: Royal Society of Chemistry journal article supplement (doi:10.1039/d4tc04626a), 2024-12-16
Supplement: d4tc04626a1.pdf [file d4tc04626a1.pdf]

## Supporting Information

### Controlling optoelectronic properties through protonation with $\pi$ -extended triphenodioxazine diimides

Rhea Kumar,<sup>a</sup> Mario Taddei,<sup>f</sup> Vasilis Petropoulos,<sup>a</sup> Mattia Russo,<sup>a</sup> Federico Vernuccio,<sup>a</sup> Giulio Cerullo,<sup>a</sup> Dario Polli,<sup>a</sup> Artur Nenov,<sup>f</sup> Nicola Demitri,<sup>e</sup> Maurizio Prato,<sup>\*b,c,d</sup> Margherita Maiuri<sup>\*a</sup> and Jacopo Dosso<sup>\*b</sup>

- a) Department of Physics, Politecnico di Milano, Piazza Leonardo da Vinci 32, 20133 Milano, Italy.
- b) Department of Chemical and Pharmaceutical Sciences, CENMAT, Centre of Excellence for Nanostructured Materials, INSTM UdR Trieste, University of Trieste, via Licio Giorgieri 1, 34127 Trieste, Italy.
- c) Centre for Cooperative Research in Biomaterials (CIC BiomaGUNE), Basque Research and Technology Alliance (BRTA), Paseo de Miramón 194, 20014, Donostia San Sebastián, Spain
- d) Basque Fdn Sci, Ikerbasque, 48013 Bilbao, Spain.
- e) Elettra—Sincrotrone, Trieste S.S. 14 Km 163.5, Area Science Park, 34149 Basovizza, Trieste (Italy)
- f) Department of industrial chemistry, University of Bologna, Viale del Risorgimento, 40136 Bologna, Italy

#### Summary

|                                                       |    |
|-------------------------------------------------------|----|
| <b>1. General Remarks</b> .....                       | 2  |
| <b>1.1 Instrumentation</b> .....                      | 2  |
| <b>1.2 Materials and synthetic methods</b> .....      | 4  |
| <b>1.3 Time-resolved spectroscopic methods</b> .....  | 4  |
| <b>2 Synthetic procedures and spectral data</b> ..... | 6  |
| <b>2.1 Synthesis of 3</b> .....                       | 6  |
| <b>2.2 Synthesis of 4</b> .....                       | 6  |
| <b>2.3 Synthesis of 5</b> .....                       | 7  |
| <b>2.4 Synthesis of 1</b> .....                       | 8  |
| <b>2.5 Synthesis of 7</b> .....                       | 9  |
| <b>2.6 Synthesis of 8</b> .....                       | 9  |
| <b>2.7 Synthesis of 9</b> .....                       | 10 |
| <b>2.8 Synthesis of 10</b> .....                      | 10 |
| <b>2.9 Synthesis of 1Br</b> .....                     | 11 |
| <b>3 NMR and HRMS spectra</b> .....                   | 12 |
| <b>3.1 Characterization of 3</b> .....                | 12 |
| <b>3.2 Characterization of 4</b> .....                | 13 |
| <b>3.3 Characterization of 5</b> .....                | 15 |
| <b>3.4 Characterization of 1</b> .....                | 16 |
| <b>3.5 Characterization of 7</b> .....                | 20 |
| <b>3.6 Characterization of 8</b> .....                | 21 |
| <b>3.7 Characterization of 9</b> .....                | 22 |
| <b>3.8 Characterization of 10</b> .....               | 24 |

|   |                                                                   |    |
|---|-------------------------------------------------------------------|----|
| 4 | UV-Vis and electrochemistry studies .....                         | 25 |
| 5 | Cyclic Voltammetry studies .....                                  | 28 |
| 6 | Computational, Raman and two-dimensional electronic spectra ..... | 29 |
| 7 | X-Ray diffraction .....                                           | 40 |

## 1. General Remarks

### 1.1 Instrumentation

**Thin layer chromatography** (TLC) was conducted on Sigma Aldrich pre-coated aluminum sheets (0.25 mm layer thickness, 60 Å porosity and fluorescent indicator GF254) and were visualized using 254 or 365 nm light. Flash column chromatography was carried out using Merck Gerduran silica gel 60 (particle size 40-63 µm). **Melting points** (M.P.) were measured on a Gallenkamp apparatus. All melting points have been measured in open capillary tubes and have not been corrected. **Nuclear magnetic resonance** (NMR) <sup>1</sup>H, and <sup>13</sup>C spectra were obtained on Varian Inova spectrometer (500 MHz <sup>1</sup>H and 126 MHz <sup>13</sup>C) or Varian 400 MHz NMR spectrometer (400 MHz <sup>1</sup>H and 101 MHz <sup>13</sup>C). Chemical shifts were reported in ppm according to tetramethylsilane using the solvent residual signal as an internal reference (CDCl<sub>3</sub>: δ<sub>H</sub> = 7.26 ppm, δ<sub>C</sub> = 77.16 ppm, CD<sub>2</sub>Cl<sub>2</sub>: δ<sub>H</sub> = 5.32 ppm, δ<sub>C</sub> = 53.84 ppm, TFA-*d*1: δ<sub>H</sub> = 11.50 ppm, δ<sub>C</sub> = 164.20, 116.60 ppm). Coupling constants (*J*) were given in Hz. Resonance multiplicity was described as s (singlet), d (doublet), t (triplet), m (multiplet), br (broad signal), dd (doublet of doublets), dt (doublet of triplets). Carbon spectra were acquired with a complete decoupling for the proton, unless specified. All spectra were recorded at 25 °C unless specified. **Infrared spectra** (IR) were recorded on a Shimadzu IR Affinity 1S FTIR spectrometer in ATR mode with a diamond mono-crystal. Selected absorption bands are reported in wavenumber (cm<sup>-1</sup>). **Coherent Anti-Stokes Raman Scattering (CARS) spectra** were recorded using a home-built setup that has been described in detail previously.<sup>1</sup> Briefly, the system started with an amplified ytterbium fiber laser (Coherent Monaco) generating pulses (270 fs, 1035 nm) which split into two beams using a beam splitter. One portion of the beam was used to generate pump pulses (3.7 ps, 1035 nm) using an optimized etalon achieving spectral resolution of < 9 cm<sup>-1</sup> FWHM. The other portion of the beam was focused into a 10 mm thick Yttrium Aluminium Garnet (YAG) crystal to generate a white light continuum, from which the residual fundamental was filtered out using a long-pass filter. The Stokes pulses were then compressed to ~20 fs using a SF<sub>11</sub> prism-pair compressor. The pump and Stokes beams were combined and focused onto the sample and the resulting spectra were recorded using a spectrometer, composed of a monochromator equipped with a CCD camera. By utilising CARS Spectroscopy, we detected the blue-shifted component of the spectrum thus avoiding the problematic high fluorescence signal, which renders the vibrational spectra for the studied systems impossible to measure by the Spontaneous Raman Spectroscopy technique. The CARS spectra shown in Fig. S41 were obtained by averaging 100 spectra acquired with 5 ms spectrum dwell time. After acquisition, we removed the non-resonant background, deriving from four-wave mixing processes, through the time-domain Kramers-Kronig algorithm.<sup>2</sup>

**ESI-High resolution mass spectrometry (ESI-HRMS).** ESI-HRMS was performed at University of Trieste Chemistry department, High resolution mass spectra (HRMS) were obtained on Bruker micrOTOF-Q (ESI-TOF). Low resolution mass spectra (LRMS) were obtained on Bruker Esquire 4000 (ESI). **Photophysical analysis:** Absorption spectra of compounds were recorded on air equilibrated solutions at room temperature with an Agilent Cary 5000 UV-Vis-NIR double beam spectrophotometer, using quartz cells with path length of 1.0 cm. Emission measurements were performed on an Edinburgh instruments FS5 spectrofluorometer using a 150 W CW Ozone-free xenon arc lamp as source and a Photomultiplier R928P (spectral coverage 200 nm – 900 nm, cooled and stabilised) as detector. Quantum yields were performed using the integrating sphere setup SC-30 on a sample solution in a quartz cuvette and using the same solvent in another cuvette as reference. Fluorescence decay dynamics studies have been performed using 635 nm laser pulses on a FLS1000 by Edinburgh Instruments equipped with a PMT-980 detector. 10 mm path length Hellma Analytics sealable quartz cuvettes have been used. **Cyclic Voltammetry (CV)** The electrochemical characterizations were carried out in CH<sub>2</sub>Cl<sub>2</sub>/0.1 M tetrabutylammonium hexafluorophosphate (TBAPF<sub>6</sub>), at room temperature, on an Autolab 302 N electrochemical workstation (Metrohm, The Netherlands) in a glass cell from CH Instruments (10 mL, CHI220). A typical three-electrode cell was employed, which was composed of glassy carbon (GC) working electrode (3 mm diameter), a platinum wire as counter electrode and a saturated calomel electrode (SCE) as reference electrode (RE). Oxygen was removed by purging the CH<sub>2</sub>Cl<sub>2</sub> solution with Argon. The GC electrode was polished twice before use with 0.05 and 0.1 colloidal silica polishing suspension, Pt counter electrode was polished on a flame to remove organic materials. HOMO and LUMO values were obtained by converting potentials vs SCE to vs Fc/Fc<sup>+</sup> using a CV measurement performed in the same conditions on Fc and by applying the following formula: E HOMO = -(4.8 eV + E<sub>1ox</sub> vs. Fc<sup>+</sup>/Fc) E LUMO = -(4.8 eV + E<sub>1red</sub> vs. Fc<sup>+</sup>/Fc). In the cases where oxidation waves were not detected by means of cyclic voltammetry, HOMO levels were calculated using the optical gap E<sub>00</sub>, following equation: E<sub>00</sub>(eV) = 1240 (eV·nm) / λ<sub>max, rel</sub> (nm). **X-Ray Data:** CCDC 2383224, 2383220, 2383219, 2383221, 2383222 and 2383223 contain the supplementary crystallographic data for **1** at 100K, **1** at 298K, **1Br** at 100K, **1•TFA** polymorph α at 100K, **1•TFA** polymorph α at 298K and **1•TFA** polymorph β at 100K, respectively. Related files can be obtained free of charge from The Cambridge Crystallographic Data Centre via <https://www.ccdc.cam.ac.uk/structures>.

## 1.2 Materials and synthetic methods

Chemicals were purchased from Sigma Aldrich, TCI, Alfa Aesar and Fluorochem and were used as received unless otherwise stated. Solvents were purchased from Sigma Aldrich and Alfa Aesar, while deuterated solvents from Eurisotop and Sigma Aldrich. Anhydrous conditions were achieved by repeated cycles of flaming with a heat gun under vacuum and purging with Argon (Ar). The inert atmosphere was maintained using Argon-filled balloons equipped with a syringe and needle that was used to penetrate the silicon stoppers used to close the flask's necks. Additions of liquid reagents were performed using plastic syringes. Degassing of solutions was performed by bubbling argon in the reaction under sonication for at least 10 minutes. Dry solvents were obtained commercially or via treatment on activated molecular sieves (MS, 3Å for CH<sub>3</sub>CN).

Activation of MS was carried out by multiple cycles of heating under vacuum and the solvents were left over MS for at least 24 h. MilliQ water was obtained from a Millipore Milli-Q Plus 185 apparatus and presented a resistivity of 18.2 M $\Omega$ cm. MilliQ water was always used unless otherwise specified. Derivative **2** was synthesised according to a previously reported synthesis.<sup>3</sup> Microwave syntheses were performed on a CEM Discover-SP, using 10 mL glass microwave vials.

### 1.3 Time-resolved spectroscopic methods

**Transient absorption spectroscopy.** A Ti:Sapphire regenerative amplifier (Libra, Coherent) generated pulses (100 fs, 800 nm, 1 kHz) which seeded a non-collinear optical parametric amplifier (NOPA) to yield a broadband pulse spectrum (530-750 nm) with < 0.5 % RMS fluctuations. The NOPA output pulses were compressed to sub-20 fs duration using a pair of chirped mirrors and the beam was split by a beamsplitter to generate separate pump and probe beams. Transient experiments were performed with perpendicular polarisation of pump and probe to minimise scattering of the pump beam. Pump and probe beams were focused onto a spot on the sample of diameters of 230  $\mu$ m and 90  $\mu$ m, respectively. A mechanical delay stage controlled the time delay between the pump and probe pulses; the pump-probe delay was scanned in 5 fs steps up to 1 ps. The pump beam was modulated at 500 Hz by a mechanical chopper to collect both pump-on and pump-off spectra such that difference spectra were recorded to observe only the pump-excited signals. Solutions of the sample were prepared in dichloromethane at concentrations of OD=0.5 and were measured in a 0.2 mm cuvette.

**Two-dimensional electronic spectroscopy (2DES).** The TA setup can be easily converted into a 2DES setup working in a pump-probe geometry and it is described in detail elsewhere).<sup>4</sup> Briefly, the same NOPA pulses pumped by the Ti:Sapphire laser were used for the 2DES measurements. The NOPA pulses were compressed down to sub-15 fs by a chirped mirror pair and then split into two separate pump and probe beams. The pump beam was used to generate a pair of phase-locked pump pulses using a Translating Wedge-based Identical Pulse Encoding System (TWINS), where translation of a set of birefringent  $\alpha$ -barium borate ( $\alpha$ -BBO) wedges controlled the time delay,  $t_1$ , between the two pulses. 2DES experiments were performed with perpendicular polarisation of the two pump pulses relative to the probe to minimise scattering of the pump beam. Pump and probe beams were focused onto a spot on the sample of diameters of 230  $\mu$ m and 90  $\mu$ m, respectively. A mechanical delay stage controlled the time delay,  $t_2$ , between the pump and probe pulses; the pump-probe delay was scanned in 5 fs steps up to 1 ps. The pump pulses were modulated at 500 Hz to collect both pump-on and pump-off spectra such that difference spectra were recorded to observe only the pump-excited signals. A second beamsplitter divided a portion of the pump beam to be measured using a photodiode in order to calibrate the  $t_1$  delay. Solutions of the sample were prepared in dichloromethane at concentrations of OD=0.5 and were measured in a 0.2 mm cuvette. The kinetic traces for a particular electronic transition are extracted from 2D maps at different  $t_2$  times for given excitation/detection wavelength. Progression of the vibrational

wavepacket gives rise to oscillations in the 2D signal in the time domain, with frequencies that correspond to the frequency of the vibrational modes. Therefore, projection of the  $t_2$  time domain data onto the frequency domain by the Fourier Transform yields a frequency-resolved spectrum of the vibrational modes coupled to the given electronic transition.

## 2 Synthetic procedures and spectral data

### 2.1 Synthesis of 3

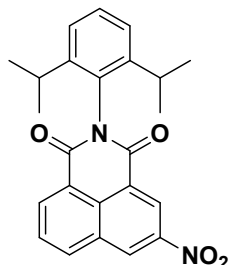

In a round bottom flask, 2-nitronaphthalene-1,3-monoanhydride **2** (1.5 g, 6.2 mmol) was added and suspended in AcOH (25 mL). 2,6-diisopropyl aniline (1.4 mL, 7.4 mmol) was then added, and the resulting suspension heated at 110°C for 18 h. The brown solution was then allowed to cool to r.t., dropped in H<sub>2</sub>O and filtered followed by washing with small amounts of cold MeOH and Et<sub>2</sub>O to give **3** as a beige solid (1.98 g, 80%). Further purification to remove the 1-NO<sub>2</sub> isomer can be achieved by crystallization from EtOH.

M.P.: 246-247 °C. <sup>1</sup>H NMR (400 MHz, CDCl<sub>3</sub>) δ 9.37 (d, *J* = 2.2 Hz, 1 H), 9.22 (d, *J* = 2.2 Hz, 1 H), 8.85 (dd, *J* = 7.3, 1.0 Hz, 1 H), 8.51 (d, *J* = 8.3 Hz, 1 H), 8.00 (dd, *J* = 8.1, 7.4 Hz, 1 H), 7.50 (t, *J* = 7.8 Hz, 1 H), 7.35 (d, *J* = 7.8 Hz, 2 H), 2.70 (sept, *J* = 6.8 Hz, 2 H), 1.16 (dd, *J* = 6.9, 1.8, Hz, 12 H). <sup>13</sup>C NMR (101 MHz, CDCl<sub>3</sub>) δ 163.29, 162.67, 146.62, 145.68, 136.00, 135.12, 131.42, 130.95, 130.25, 130.02, 129.34, 124.92, 124.89, 124.35, 123.34, 29.39, 24.14, 24.11. IR (ATR) ν (cm<sup>-1</sup>): 3084, 2967, 2930, 2870, 1717, 1674, 1593, 1541, 1506, 1416, 1366, 1344, 1329, 1240, 1206, 1180, 1144, 1115, 1074, 1057, 1040, 945, 924, 910, 876, 853. ESI-HRMS: [M+Na]<sup>+</sup> calc. for [C<sub>24</sub>H<sub>22</sub>N<sub>2</sub>O<sub>4</sub>Na]<sup>+</sup> : 425.1472; found 425.1470.

### 2.2 Synthesis of 4

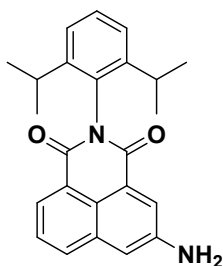

In a round bottom flask, **3** (2.0 g, 4.97 mmol) was added and dissolved in a mixture of EtOAc/EtOH (200 and 80 mL respectively). The reaction was then degassed by argon bubbling and sonication for 5 min. and SnCl<sub>2</sub>·2H<sub>2</sub>O (4.7 g, 24.8 mmol) was then added, followed by further 5 min. degassing. The reaction was then heated at 60°C for 18 h under Ar atmosphere. The resulting bright yellow solution was then concentrated under reduced pressure and a sat. solution of K<sub>2</sub>CO<sub>3</sub> added. The resulting suspension was extracted with EtOAc (3 × 100 mL), and the resulting organic layer washed with H<sub>2</sub>O (2 × 100 mL) and brine (100 mL). The EtOAc solution was dried over Na<sub>2</sub>SO<sub>4</sub>, filtered and evaporated under reduced pressure to afford a yellow solid which was further purified using a silica gel plug (CH<sub>2</sub>Cl<sub>2</sub>) to give **4** as a bright yellow solid (1.47 g, 79%).

M.P.: >300°C. <sup>1</sup>H NMR (400 MHz, CDCl<sub>3</sub>) δ 8.38 (dd, *J* = 7.2, 1.1 Hz, 1 H), 8.11 (d, *J* = 2.4 Hz, 1 H), 8.01 (d, *J* = 8.4 Hz, 1 H), 7.66 (dd, *J* = 8.2, 7.3 Hz, 1 H), 7.46 (t, *J* = 7.7 Hz, 1 H), 7.38 (d, *J* = 2.4 Hz, 1 H), 7.32 (d, *J* = 7.7 Hz, 2 H), 4.26 (bs, 2H), 2.74 (sept, *J* = 6.9 Hz, 2 H), 1.15 (d, *J* = 6.9 Hz, 12 H). <sup>13</sup>C NMR (101 MHz, CD<sub>2</sub>Cl<sub>2</sub>) δ 165.10, 164.92, 146.66, 146.24, 134.31, 132.62, 132.07, 129.81, 128.15, 127.82, 124.52, 124.12, 123.63, 123.04, 122.87, 114.67, 29.58, 24.24, 24.22. IR (ATR) ν (cm<sup>-1</sup>): 3462, 3370, 2967, 2932, 2868, 1695, 1651, 1632, 1616, 1597, 1578, 1516, 1470, 1445, 1383, 1371, 1362, 1341, 1304, 1254, 1231, 1215, 1179, 1169, 1140, 1098, 1057, 989, 955, 937, 924, 874, 858, 833, 818, 800. ESI-HRMS: [M+Na]<sup>+</sup> calc. for [C<sub>24</sub>H<sub>24</sub>N<sub>2</sub>O<sub>2</sub>Na]<sup>+</sup>: 395.1730; found 395.1776.

### 2.3 Synthesis of 5

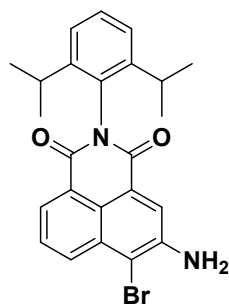

In a round bottom flask, **4** (1.0 g, 2.68 mmol) was added and dispersed in dioxane (30 mL). The resulting yellow suspension was heated to 80°C until complete dissolution of **4**. Br<sub>2</sub> (145 μL, 2.83 mmol) was then added dropwise at the same temperature resulting in the formation of a faint yellow precipitate. After 1 h the reaction was filtered and washed extensively with PE. The faint yellow solid was then dispersed in CH<sub>2</sub>Cl<sub>2</sub> (100 mL) and washed with a sat. aq. solution of NaHCO<sub>3</sub> followed by a sodium thiosulfate one (1 g in 100 mL), H<sub>2</sub>O (50 mL) and brine (50 mL). The organic layers were then dried over Na<sub>2</sub>SO<sub>4</sub>, filtered and evaporated to give **5** as a dark yellow powder (1.04 g, 86%).

M.P.: 297 °C. <sup>1</sup>H NMR (400 MHz, CDCl<sub>3</sub>) δ 8.44 (dd, *J* = 2.9, 0.9 Hz, 1 H), 8.42 (dd, *J* = 4.3, 1.0 Hz, 1 H), 8.19 (s, 1 H), 7.78 (dd, *J* = 8.5, 7.3 Hz, 1 H), 7.47 (t, *J* = 7.8 Hz, 1 H), 7.32 (d, *J* = 7.8 Hz, 2 H), 4.71 (bs, 2 H), 2.71 (sept, *J* = 6.9 Hz, 2 H), 1.15 (dd, *J* = 6.9, 1.4 Hz, 12 H). <sup>13</sup>C NMR (101 MHz, CDCl<sub>3</sub>) δ 164.16, 163.96, 145.78, 143.50, 132.33, 131.47, 130.82, 129.71, 128.59, 128.37, 124.18, 123.65, 122.93, 122.75, 122.06, 110.58, 29.28, 24.11, 24.09. IR (ATR) ν (cm<sup>-1</sup>): 3464, 3348, 3071, 2961, 2926, 2868, 1703, 1668, 1614, 1597, 1562, 1506, 1466, 1447, 1423, 1383, 1337, 1292, 1256, 1233, 1209, 1194, 1144, 1098, 1057, 1009, 980, 972, 951, 939, 920, 899, 883, 837, 800. ESI-HRMS: [M+H]<sup>+</sup> calc. for [C<sub>24</sub>H<sub>24</sub>BrN<sub>2</sub>O<sub>2</sub>]<sup>+</sup>: 451.1016; found 451.1016.

## 2.4 Synthesis of 1

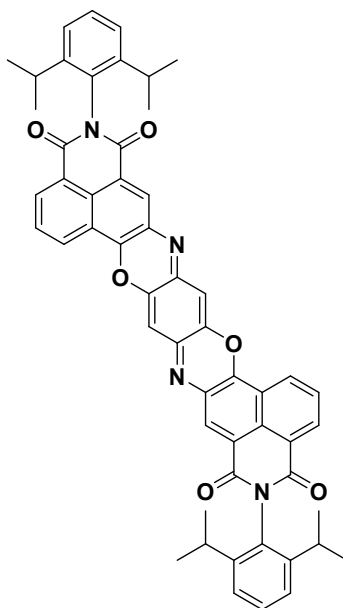

In a Microwave vial **5** (500 mg, 1.11 mmol) was added along with 2,5-dihydroxybenzoquinone **6** (78 mg, 0.55 mmol) and suspended in 1.0 mL of heptanoic acid. The reaction was then heated under MW irradiation at 200 °C for 1h. After cooling down, the black tar was suspended in Et<sub>2</sub>O (10 mL), sonicated and centrifuged (6000 rpm, 10 min.). The precipitate was again suspended in Et<sub>2</sub>O (8 mL) and Et<sub>3</sub>N (2 mL), sonicated and again centrifuged. Finally, the solid was suspended, sonicated and centrifuged 3 times from methanol. The dark red solid was then purified via a neutral alumina plug (CH<sub>2</sub>Cl<sub>2</sub> 100% to CH<sub>2</sub>Cl<sub>2</sub>/EtOAc 95/5) to give **1** as a bright red amorphous solid (231 mg, 50%). Further purification can be achieved by repeated cycles of precipitation/centrifugation from MeOH/CH<sub>2</sub>Cl<sub>2</sub>, MeOH and Et<sub>2</sub>O.

<sup>1</sup>H NMR (500 MHz, CD<sub>2</sub>Cl<sub>2</sub>) δ 8.71 (d, *J* = 8.4 Hz, 2H), 8.68-8.65 (m, 4H), 7.91 (dd, *J* = 8.4, 7.3 Hz, 2H), 7.51 (t, *J* = 7.8 Hz, 2H), 7.35 (d, *J* = 7.8 Hz, 4H), 6.89 (s, 2 H), 2.77-2.71 (m, 4H), 1.14 (d, *J* = 6.8, 12H), 1.13 (d, *J* = 6.8 Hz, 12H). <sup>13</sup>C NMR (126 MHz, CD<sub>2</sub>Cl<sub>2</sub>) δ 164.48, 163.70, 153.51, 148.74, 146.61, 144.94, 133.24, 132.98, 132.52, 131.70, 130.00, 129.68, 128.47, 128.36, 124.61, 123.59, 122.11, 120.24, 108.11, 29.67, 24.26. IR (ATR) ν (cm<sup>-1</sup>): 3073, 3028, 2970, 2924, 2868, 1709, 1672, 1597, 1568, 1427, 1364, 1341, 1256, 1236, 1194, 1171, 918, 905, 893, 839, 802, 789, 781, 747, 731. ESI-HRMS: [M+H]<sup>+</sup> calc. for [C<sub>54</sub>H<sub>45</sub>N<sub>4</sub>O<sub>6</sub>]<sup>+</sup> : 845.3334; found 845.3320.

<sup>1</sup>H NMR (500 MHz, TFA-*d*1) δ 8.99-8.97 (m, 6H), 8.14 (t, *J* = 7.9 Hz, 2H), 7.70 (s, 2H), 7.53 (t, *J* = 7.9 Hz, 2H), 7.39 (d, *J* = 7.9 Hz, 4H), 2.63 (p, *J* = 6.7 Hz, 4H), 1.13 (dd, *J* = 7.1, 3.3 Hz, 24H). <sup>13</sup>C (126 MHz, TFA-*d*1) δ 166.33, 165.20, 150.69, 149.00, 146.39, 145.84, 136.69, 131.38, 130.21, 130.16, 130.02, 128.52, 128.42, 127.97, 125.33, 122.07, 121.68, 120.98, 107.24, 29.46, 22.69, 22.67.

<sup>1</sup>H NMR (400 MHz, TFA-*d*1/D<sub>2</sub>SO<sub>4</sub>) δ 9.22 (d, *J* = 8.7 Hz, 2H), 9.18 – 9.16 (m, 4H), 8.31 (t, *J* = 8.0 Hz, 2H), 8.24 (s, 2H), 7.64 (t, *J* = 7.9 Hz, 2H), 7.48 (d, *J* = 7.7 Hz, 4H), 2.68 (p, *J* = 6.9 Hz, 4H), 1.20 (dd, *J* = 6.8 Hz, 1.8 Hz, 24H).



## 2.5 Synthesis of 7

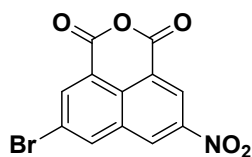

In a round bottom flask, 2-nitronaphthalene-1,3-monoanhydride **2** (1.0 g, 4.1 mmol) was added together with AgOAc (686 mg, 4.1 mmol) and suspended in H<sub>2</sub>SO<sub>4</sub> (20 mL). Br<sub>2</sub> (263 μL, 5.1 mmol) was then added, and the resulting suspension heated at 100°C for 18 h. The resulting dark suspension was then allowed to cool to r.t., dropped in H<sub>2</sub>O and filtered followed by washing with MeOH. The resulting beige powder was recrystallized from toluene to give 743 mg of **7** as a beige solid (743 mg, 56%).

<sup>1</sup>H NMR (400 MHz, CDCl<sub>3</sub>) δ 9.33 (d, *J* = 2.1 Hz, 1H), 9.15 (d, *J* = 2.1 Hz, 1H), 8.87 (d, *J* = 1.9 Hz, 1H), 8.70 (d, *J* = 1.8 Hz, 1H). <sup>13</sup>C NMR (101 MHz, CDCl<sub>3</sub>) δ 158.15, 158.09, 147.29, 139.46, 138.65, 132.56, 130.61, 129.26, 126.54, 124.19, 121.32, 120.89. IR (ATR) ν (cm<sup>-1</sup>): 3088, 1782, 1746, 1586, 1530, 1501, 1422, 1389, 1333, 1269, 1229, 1159, 1134, 1086, 1063, 1020, 955, 939, 920, 893, 874, 802, 758, 737, 714, 691.

## 2.6 Synthesis of 8

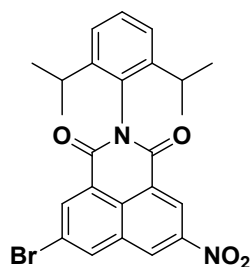

In a round bottom flask, 2-nitro-6-bromonaphthalene-1,3-monoanhydride **7** (500 mg, 1.55 mmol) was added and suspended in AcOH (10 mL). 2,6-diisopropylaniline (307 μL, 1.63 mmol) was then added, and the resulting suspension heated at 110°C for 18 h. The brown solution was then allowed to cool to r.t., dropped in H<sub>2</sub>O and filtered followed by washing with small amounts of cold MeOH and Et<sub>2</sub>O to give a beige solid (622 mg, 83%) which was directly used in the following step.

<sup>1</sup>H NMR (400 MHz, CDCl<sub>3</sub>) δ 9.35 (d, *J* = 2.1 Hz, 1H), 9.12 (d, *J* = 2.1 Hz, 1H), 8.88 (d, *J* = 1.8 Hz, 1H), 8.66 (d, *J* = 1.6 Hz, 1H), 7.51 (t, *J* = 7.8 Hz, 1H), 7.35 (d, *J* = 7.8 Hz, 2H), 2.71-2.61 (m, 2H), 1.15 (d, *J* = 6.8 Hz, 12H). <sup>13</sup>C NMR (101 MHz, CDCl<sub>3</sub>) δ 162.24, 162.19, 147.30, 145.63, 137.94, 137.43, 132.64, 130.20, 129.92, 129.36, 128.14, 125.07, 125.02, 124.63, 124.43, 123.90, 29.43, 24.11. IR (ATR) ν (cm<sup>-1</sup>): 3086, 2967, 2870, 1717, 1676, 1597, 1539, 1506, 1464, 1398, 1339, 1310, 1240, 1204, 1182, 1084, 1057, 984, 910, 870, 839, 806, 801, 756, 737, 729, 710, 601. ESI-LRMS [M+H]<sup>+</sup> calc. for [C<sub>24</sub>H<sub>22</sub><sup>79</sup>BrN<sub>2</sub>O<sub>4</sub>]<sup>+</sup> : 481.08; found 481.08.

## 2.7 Synthesis of **9**

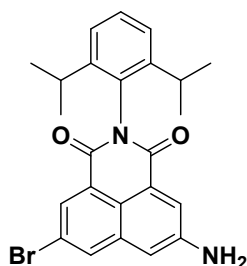

In a round bottom flask **8** (737 mg, 1.53 mmol) was added and dissolved in a mixture of EtOAc/EtOH (40 and 16 mL respectively). The reaction was then degassed by argon bubbling and sonication for 5 min. and  $\text{SnCl}_2 \cdot 2\text{H}_2\text{O}$  (1.45 g, 7.65 mmol) was then added, followed by further 5 min. degassing. The reaction was then heated at  $60^\circ\text{C}$  for 18 h under Ar atmosphere. The resulting bright yellow solution was then concentrated under reduced pressure and a sat. solution of  $\text{K}_2\text{CO}_3$  added. The resulting suspension was extracted with EtOAc ( $3 \times 100$  mL), and the resulting organic layer washed with  $\text{H}_2\text{O}$  ( $2 \times 100$  mL) and brine (100 mL). The EtOAc solution was dried over  $\text{Na}_2\text{SO}_4$ , filtered and evaporated under reduced pressure to afford a yellow solid which was further purified using a silica gel plug ( $\text{CH}_2\text{Cl}_2$ ) to give **8** as a bright yellow solid (356 mg, 52%).

$^1\text{H}$  NMR (400 MHz,  $\text{CDCl}_3$ )  $\delta$  8.41 (d,  $J = 1.8$  Hz, 1H), 8.14 (d,  $J = 1.8$  Hz, 1H), 8.07 (d,  $J = 2.3$  Hz, 1H), 7.49 – 7.45 (m, 1H), 7.32 (d,  $J = 7.8$  Hz, 2H), 7.25 (d,  $J = 2.3$  Hz, 1H), 4.26 (s, 2H), 2.75–2.65 (m, 2H), 1.14 (dd,  $J = 6.8, 1.5$  Hz, 12H).  $^{13}\text{C}$  NMR (101 MHz,  $\text{CD}_2\text{Cl}_2$ )  $\delta$  163.96, 163.53, 146.40, 145.79, 135.22, 133.53, 130.75, 130.56, 129.75, 124.22, 124.09, 122.85, 121.77, 121.70, 112.65, 29.27, 24.11. IR (ATR)  $\nu$  ( $\text{cm}^{-1}$ ): 3497, 3374, 3219, 3069, 2963, 2905, 2868, 1705, 1667, 1626, 1614, 1512, 1412, 1385, 1329, 1290, 1233, 1217, 1057, 997, 959, 939, 876, 837, 808, 801, 779, 745, 718. ESI-LRMS  $[\text{M}+\text{H}]^+$  calc. for  $[\text{C}_{24}\text{H}_{24}^{79}\text{BrN}_2\text{O}_2]^+$  : 451.10; found 451.17.

## 2.8 Synthesis of **10**

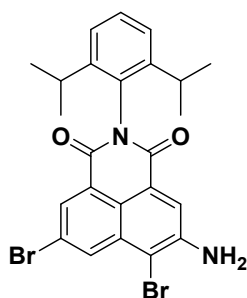

In a round bottom flask, **9** (300 mg, 0.67 mmol) was added and dispersed in dioxane (15 mL).  $\text{Br}_2$  (36  $\mu\text{L}$ , 0.7 mmol) was then added dropwise resulting in the formation of a faint yellow precipitate. After 1 h the reaction was filtered and washed extensively with PE. The faint yellow solid was then dispersed in  $\text{CH}_2\text{Cl}_2$  (100 mL) and washed with a sat. aq. solution of  $\text{NaHCO}_3$  followed by a sodium thiosulfate one (1 g in 100 mL),  $\text{H}_2\text{O}$  (50 mL) and brine (50 mL). The organic layers were then dried over  $\text{Na}_2\text{SO}_4$ , filtered and evaporated. Reprecipitation from MeOH afforded **10** as a yellow powder (303 mg, 86%).

$^1\text{H}$  NMR (400 MHz,  $\text{CDCl}_3$ )  $\delta$  8.57 (d,  $J = 1.8$  Hz, 1H), 8.48 (d,  $J = 1.8$  Hz, 1H), 8.14 (s, 1H), 7.50 – 7.46 (m, 1H), 7.32 (d,  $J = 7.8$  Hz, 2H), 4.78 (s, 2H), 2.73-2.62 (m, 2H), 1.14 (dd,  $J = 6.8, 2.6$  Hz, 12H).  $^{13}\text{C}$  NMR (101 MHz,  $\text{CDCl}_3$ )  $\delta$  163.57, 163.13, 145.75, 144.36, 133.72, 133.25, 130.95, 130.50, 129.88, 124.36, 124.27, 123.36, 122.77, 122.30, 122.07, 108.56, 29.32, 24.09. IR (ATR)  $\nu$  ( $\text{cm}^{-1}$ ): 3466, 3350, 3206, 2961, 2926, 2868, 1707, 1672, 1620, 1589, 1557, 1505, 1443, 1416, 1375, 1354, 1317, 1273, 1225, 1192, 1152, 1057, 990, 939, 899, 870, 839, 797, 777, 747, 735, 718. ESI-LRMS  $[\text{M}+\text{H}]^+$  calc. for  $[\text{C}_{24}\text{H}_{23}^{79}\text{Br}_2\text{N}_2\text{O}_2]^+$  : 531.01; found 531.08.

## 2.9 Synthesis of 1Br

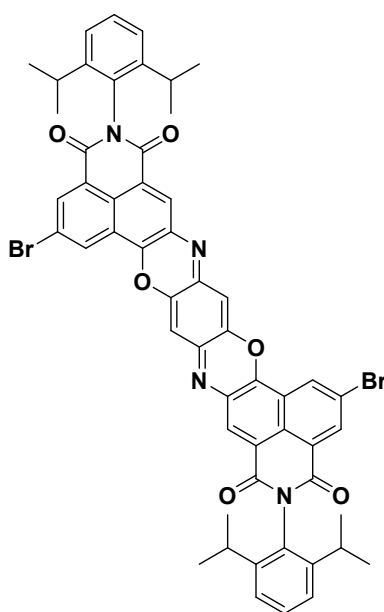

In a Microwave vial **10** (100 mg, 0.19 mmol) was added along with 2,6-dihydroxybenzoquinone **6** (13 mg, 0.09 mmol) and suspended in 100  $\mu\text{L}$  of heptanoic acid. The reaction was then heated under MW irradiation at 200  $^{\circ}\text{C}$  for 30 min. After cooling down, the black tar was diluted in  $\text{MeOH}/\text{Et}_3\text{N}$  and evaporated. The dark red solid was then purified via a SCC plug ( $\text{CH}_2\text{Cl}_2$  100% to  $\text{CH}_2\text{Cl}_2/\text{EtOAc}$  90/10) followed by a preparative TLC in  $\text{CH}_2\text{Cl}_2/\text{EtOAc}$  90/10. As a result, only 8 mg of still impure **1Br** were obtained. Crystals of good enough quality for scXRD were obtained by slow diffusion of hexane in  $\text{CHCl}_3$ .

### 3 NMR and HRMS spectra

#### 3.1 Characterization of 3

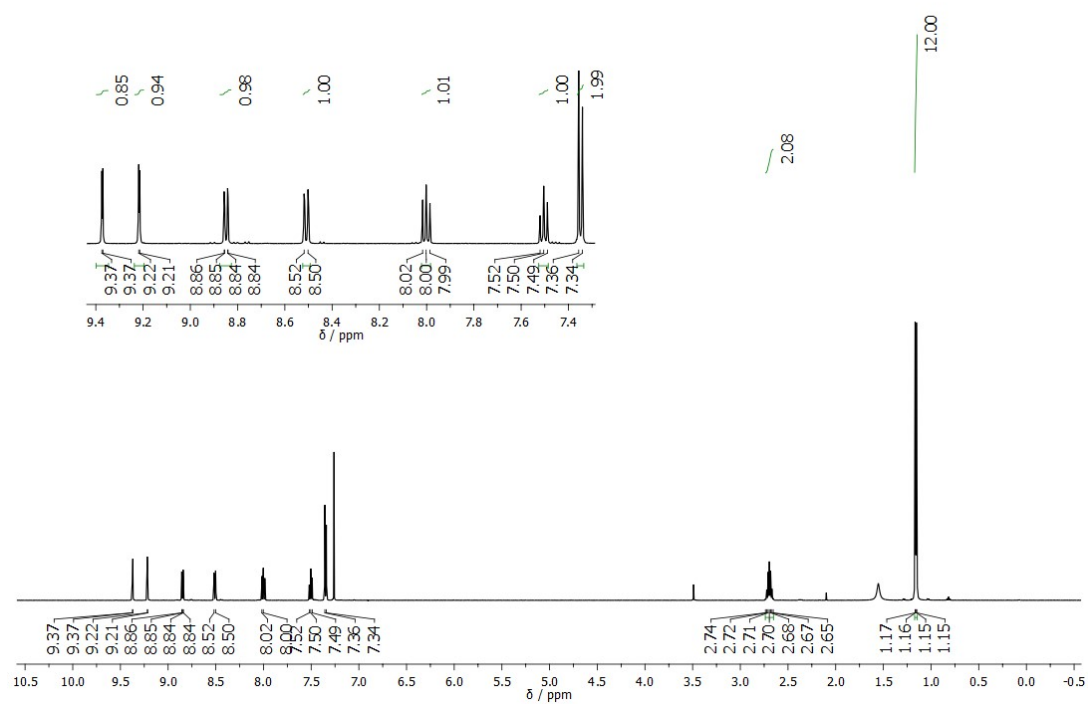

Figure S1. <sup>1</sup>H NMR 400 MHz of **3** in CDCl<sub>3</sub>

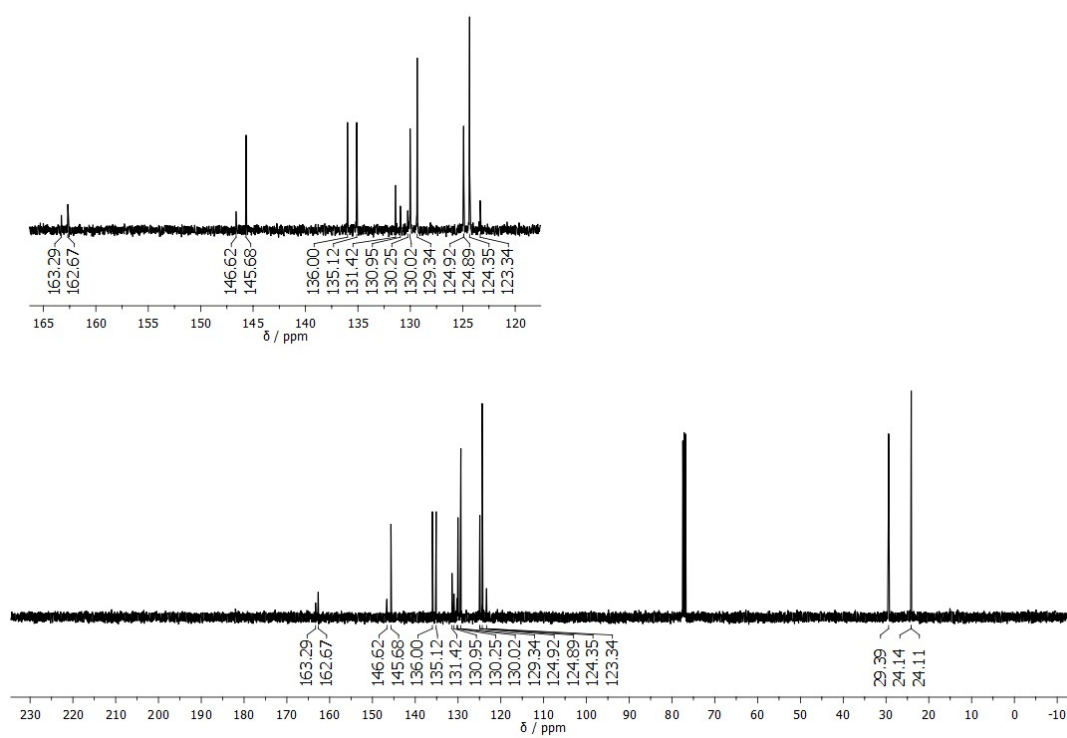

Figure S2. <sup>13</sup>C NMR 101 MHz of **3** in CDCl<sub>3</sub>.

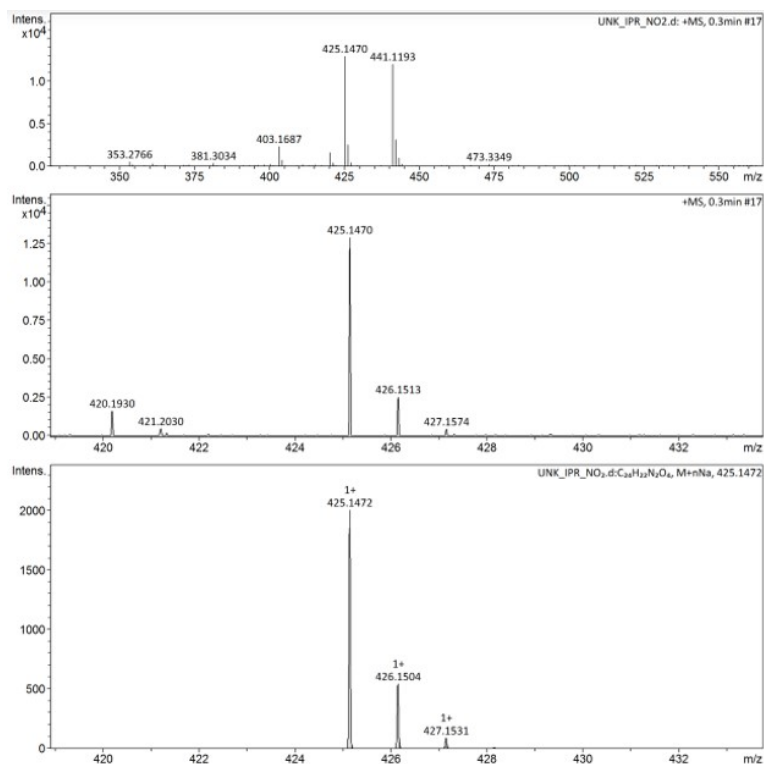

**Figure S3.** ESI-HRMS of **3**, top) experimental spectra, middle) zoom and bottom) simulated spectra.

### 3.2 Characterization of **4**

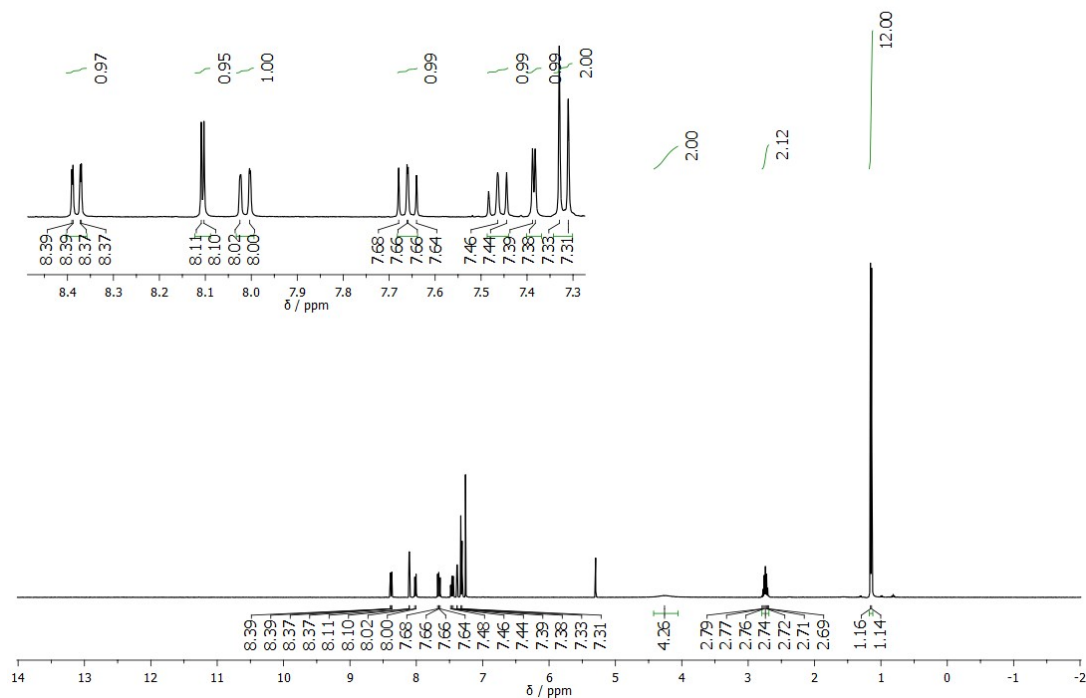

**Figure S4.**  $^1\text{H}$  NMR 400 MHz of **4** in  $\text{CDCl}_3$  (signal at 5.30 is due to residual  $\text{CH}_2\text{Cl}_2$  traces).

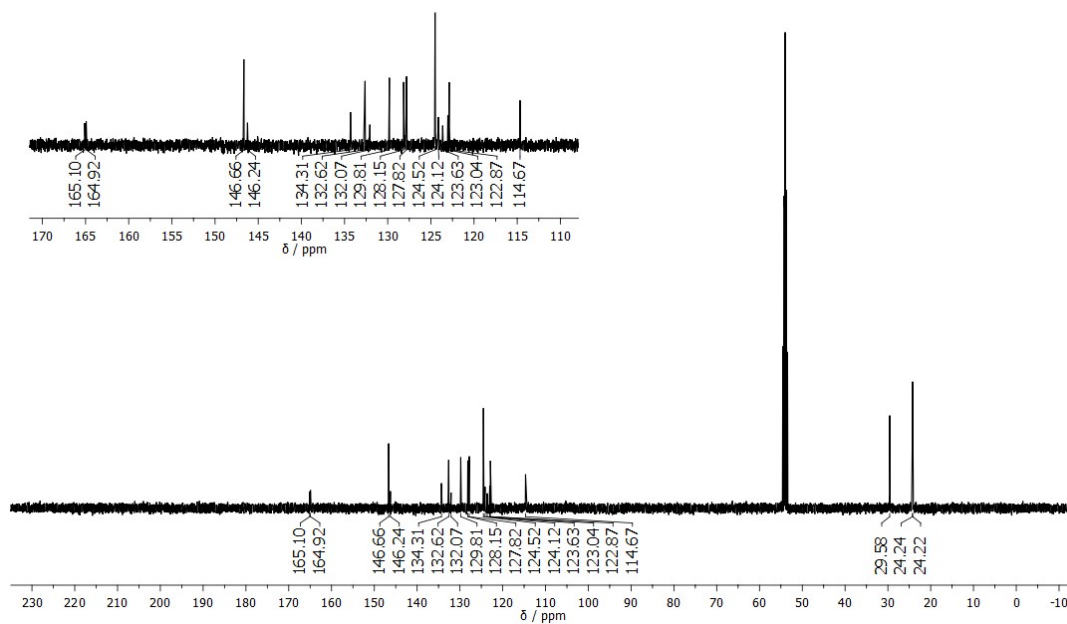

Figure S5.  $^{13}\text{C}$  NMR 101 MHz of **4** in  $\text{CDCl}_3$ .

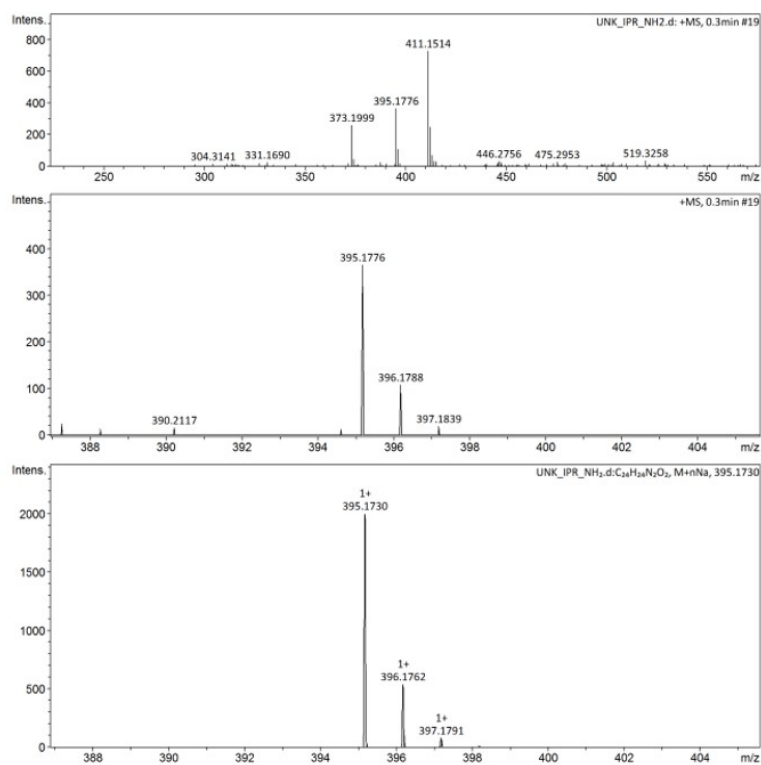

Figure S6. ESI-HRMS of **4**, top) experimental spectra, middle) zoom and bottom) simulated spectra.

### 3.3 Characterization of 5

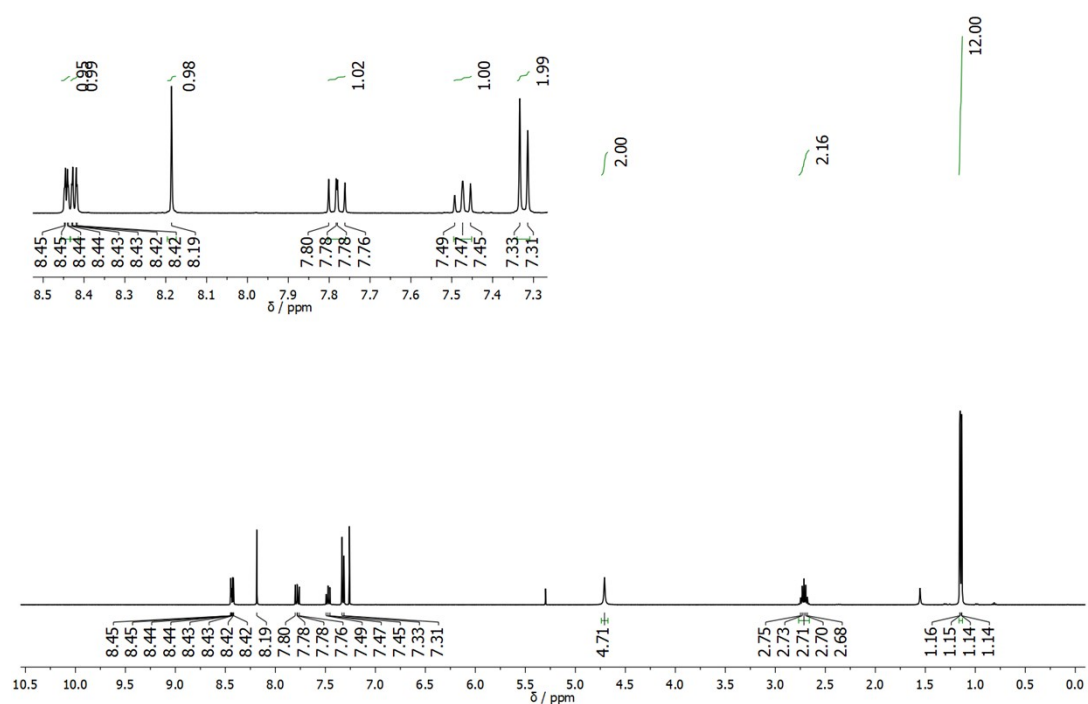

Figure S7.  $^1\text{H}$  NMR 400 MHz of **5** in  $\text{CDCl}_3$  (signal at 5.30 is due to residual  $\text{CH}_2\text{Cl}_2$  traces).

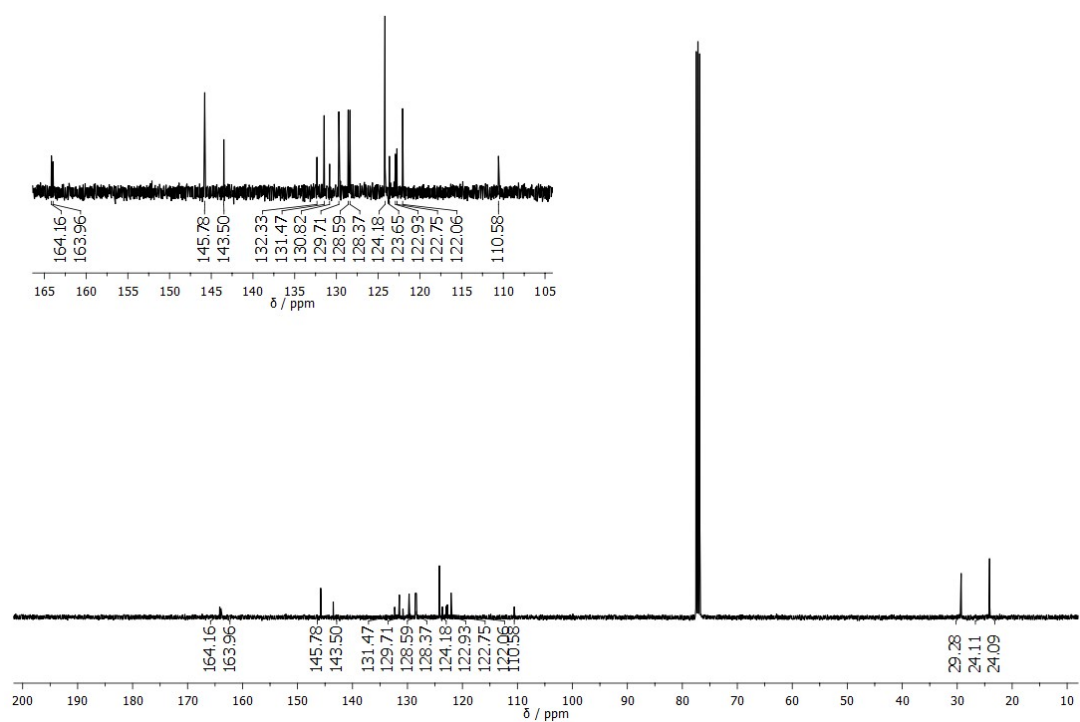

Figure S8.  $^{13}\text{C}$  NMR 101 MHz of **5** in  $\text{CDCl}_3$ .

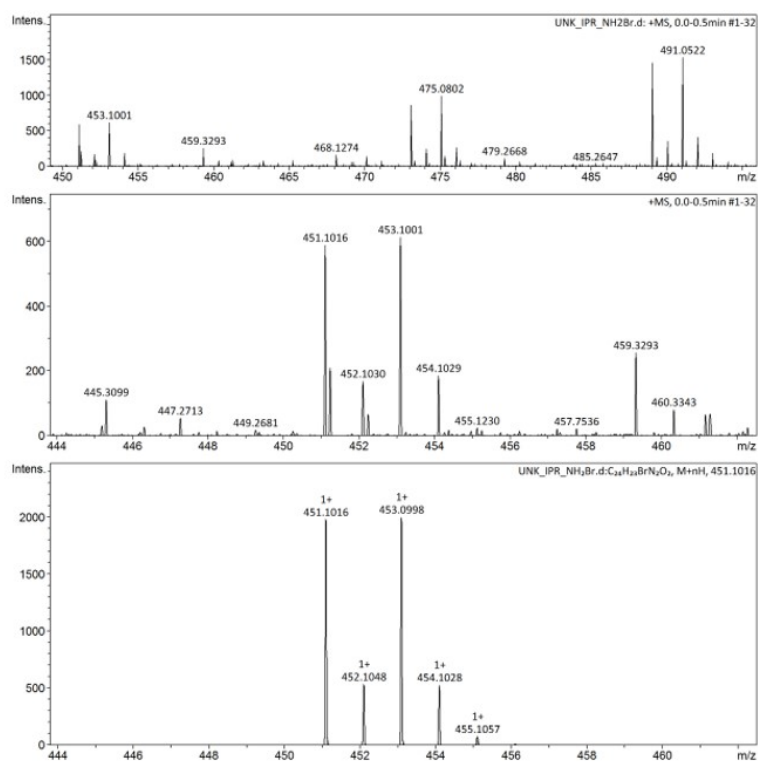

**Figure S9.** ESI-HRMS of **5**, top) experimental spectra, middle) zoom and bottom) simulated spectra.

### 3.4 Characterization of **1**

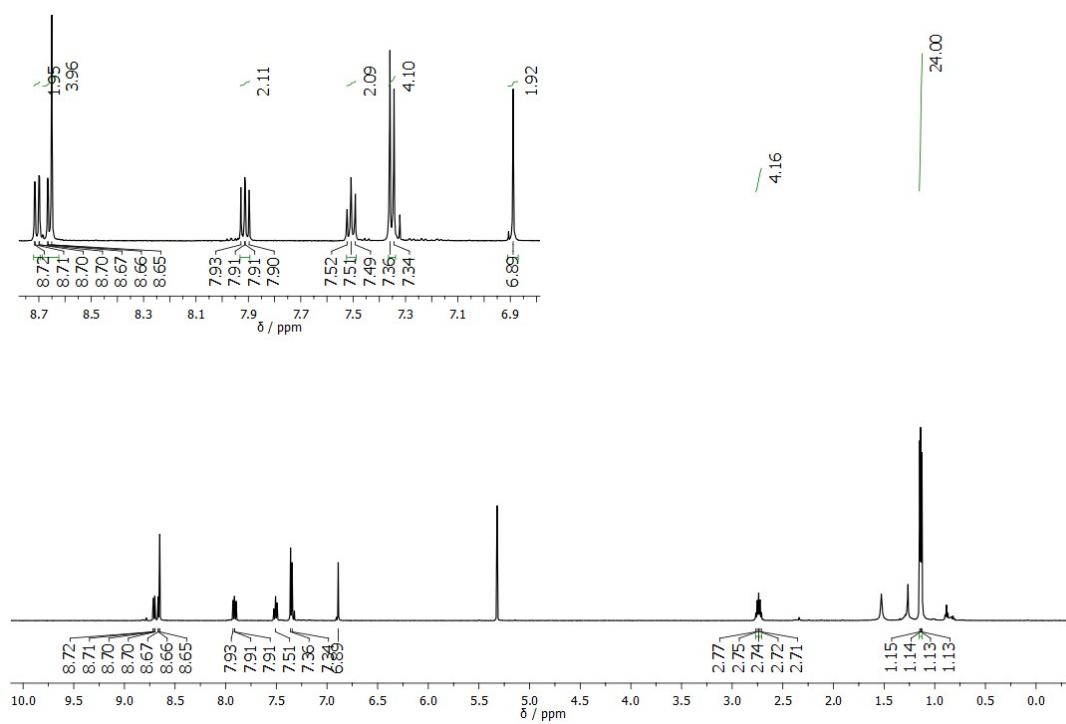

**Figure S10.**  $^1\text{H}$  NMR 500 MHz of **1** in  $\text{CD}_2\text{Cl}_2$ .



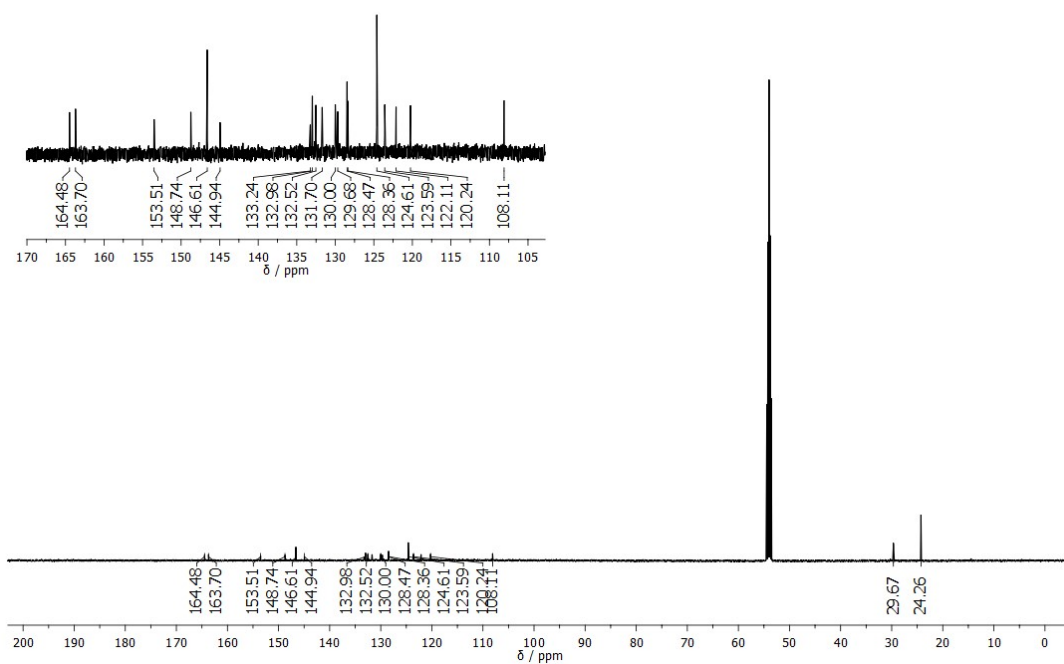

Figure S11.  $^{13}\text{C}$  NMR 126 MHz of **1** in  $\text{CD}_2\text{Cl}_2$ .

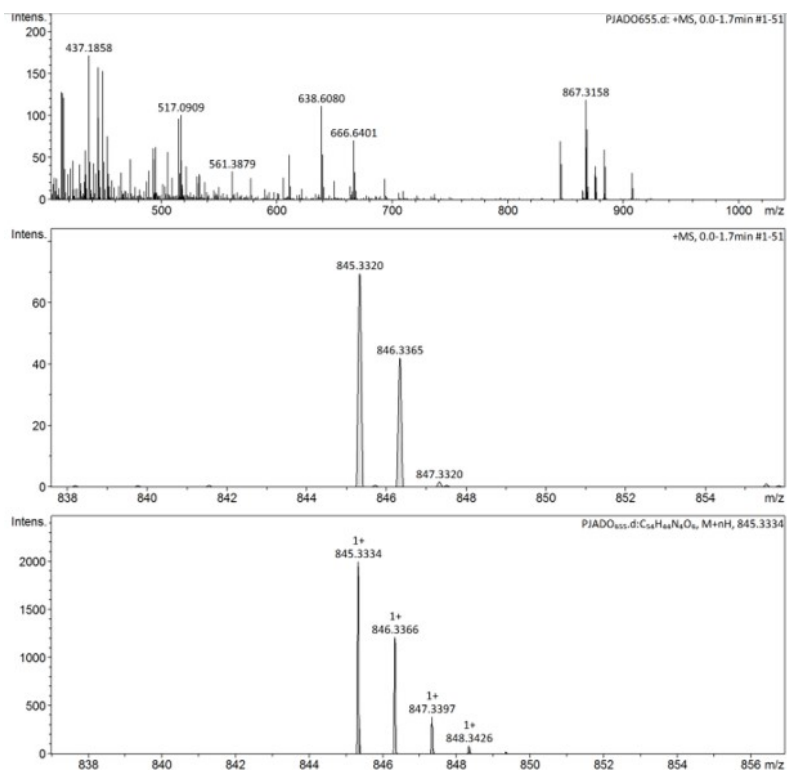

Figure S12. ESI-HRMS of **1**.

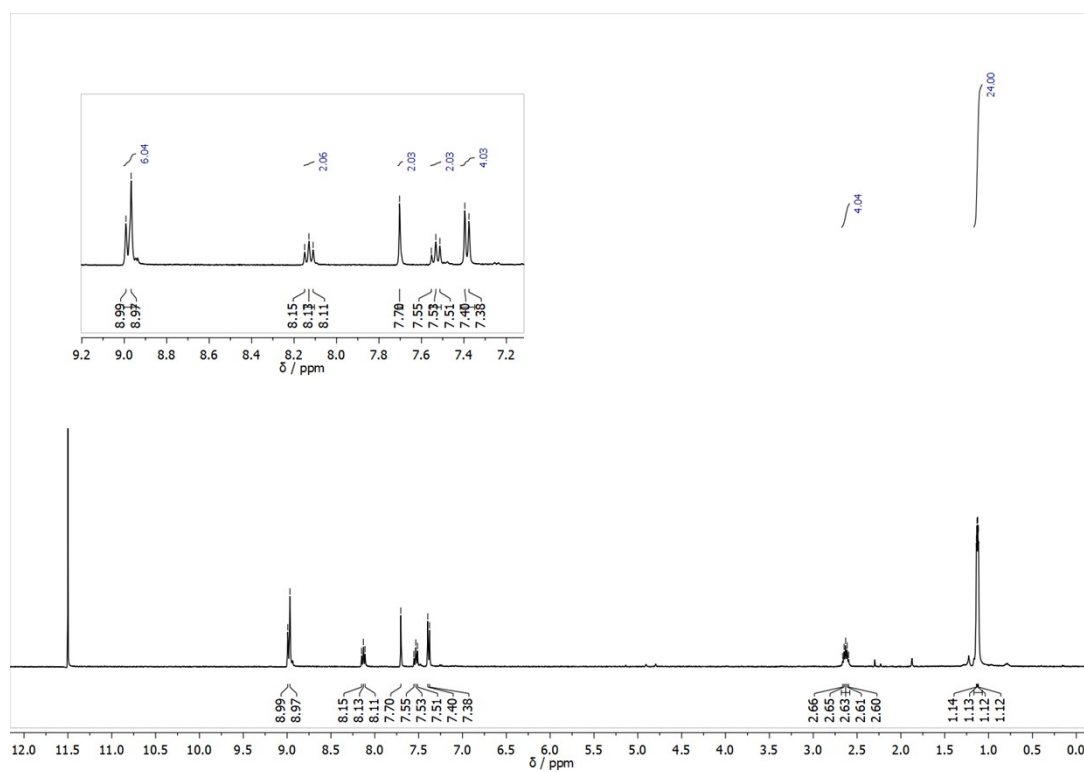

Figure S13.  $^1\text{H}$  NMR 500 MHz of  $1^{\text{H}+}$  in  $\text{TFA-}d_1$ .

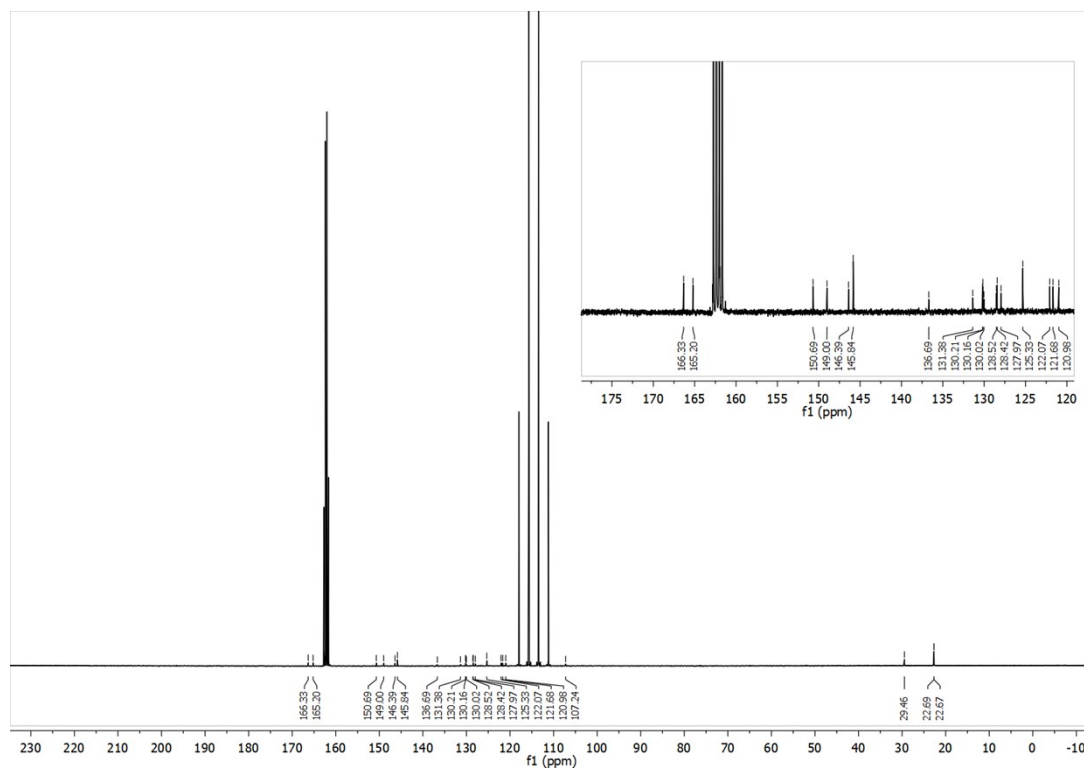

Figure S14.  $^{13}\text{C}$  NMR 126 MHz of  $1^{\text{H}+}$  in  $\text{TFA-}d_1$ .

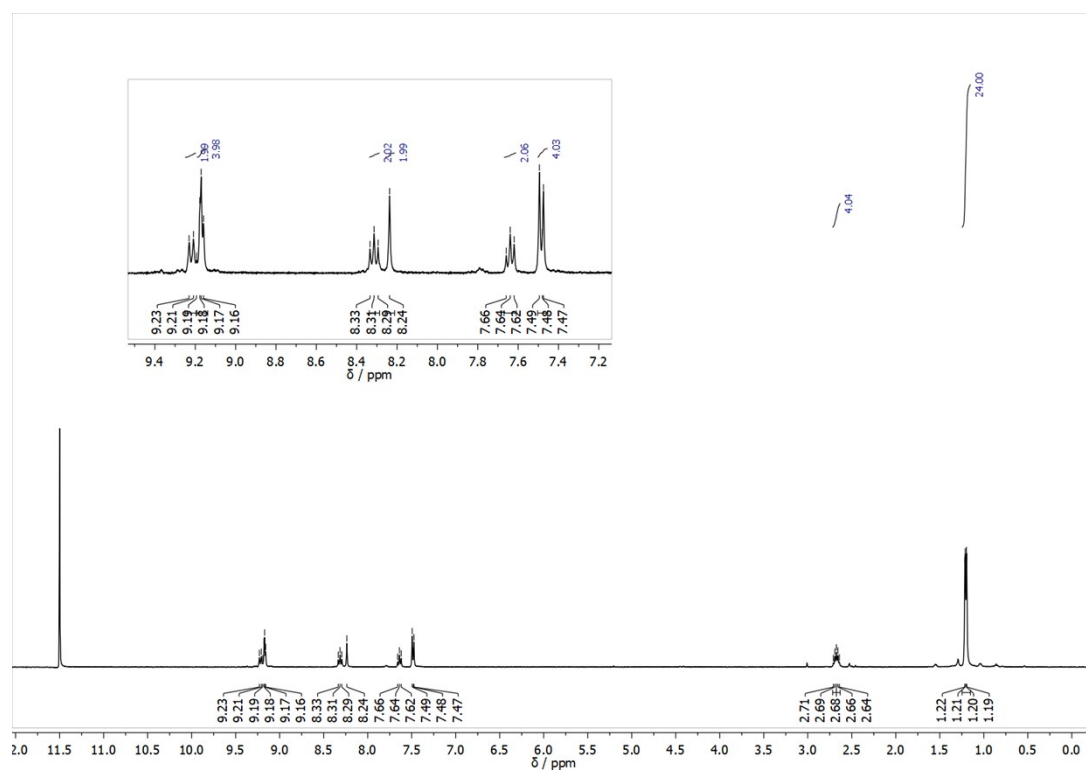

Figure S15.  $^1\text{H}$  NMR 400 MHz of  $1^{\text{H}2+}$  in  $\text{TFA-}d_1/\text{D}_2\text{SO}_4$ .

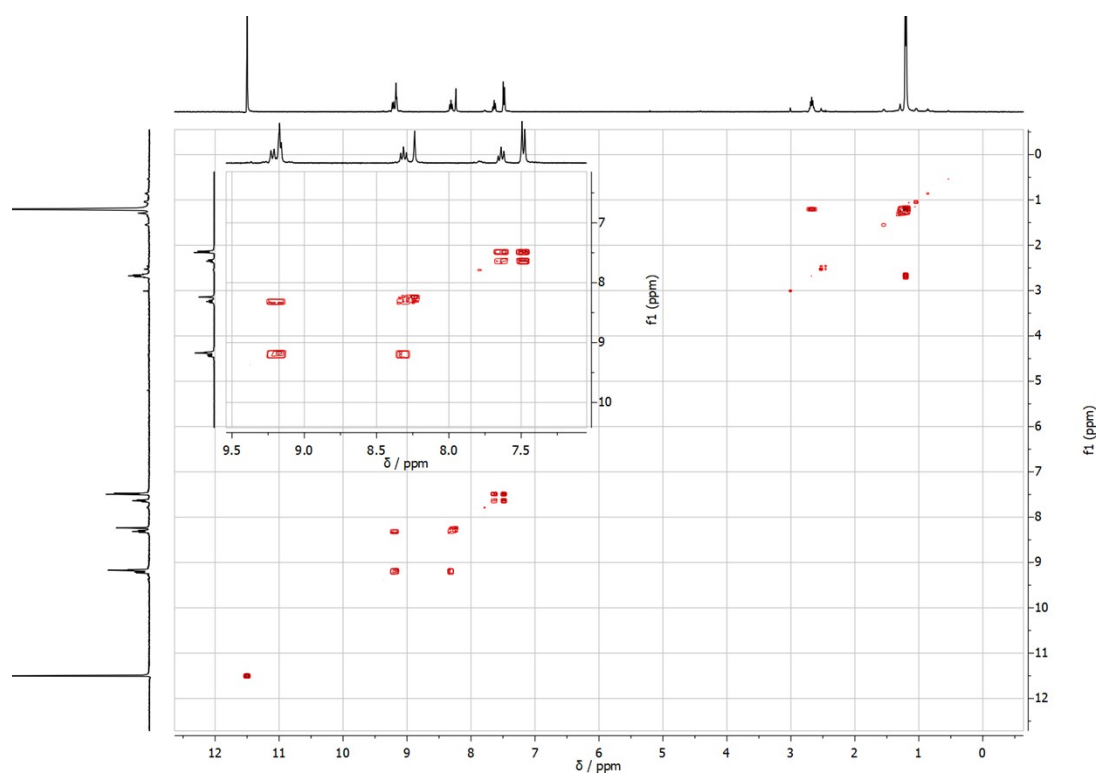

Figure S16.  $^1\text{H}$ - $^1\text{H}$  COSY NMR 400 MHz of  $1^{\text{H}2+}$  in  $\text{TFA-}d_1/\text{D}_2\text{SO}_4$ .

### 3.5 Characterization of 7

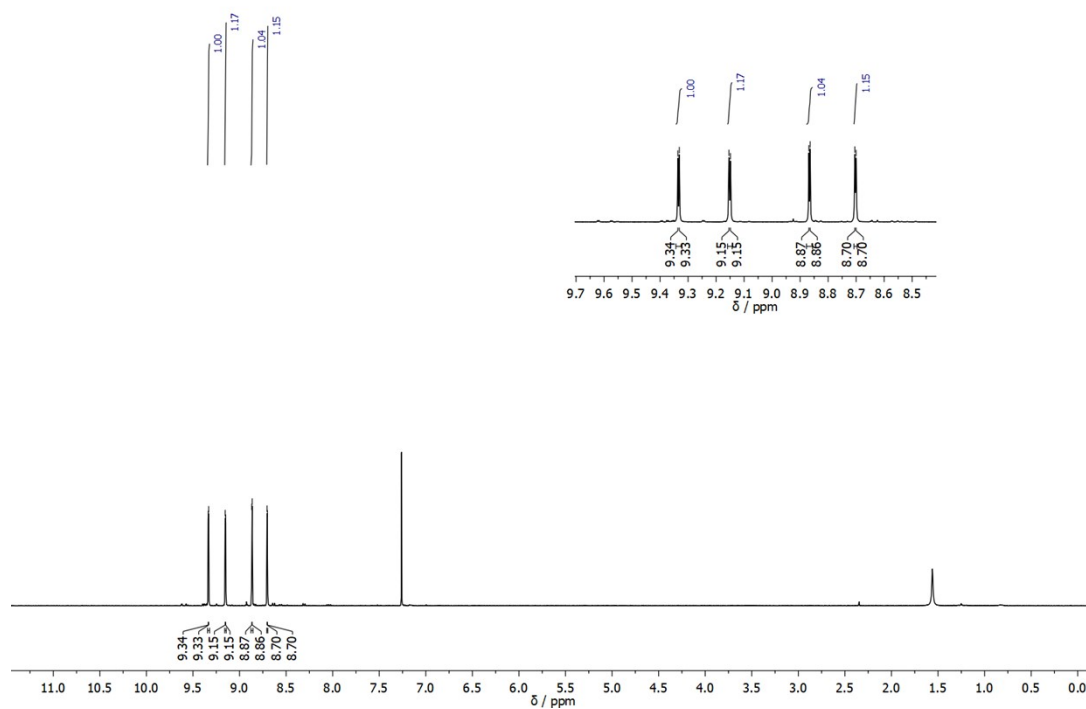

Figure S17. 400 MHz  $^1\text{H}$  NMR of 7 in  $\text{CDCl}_3$ .

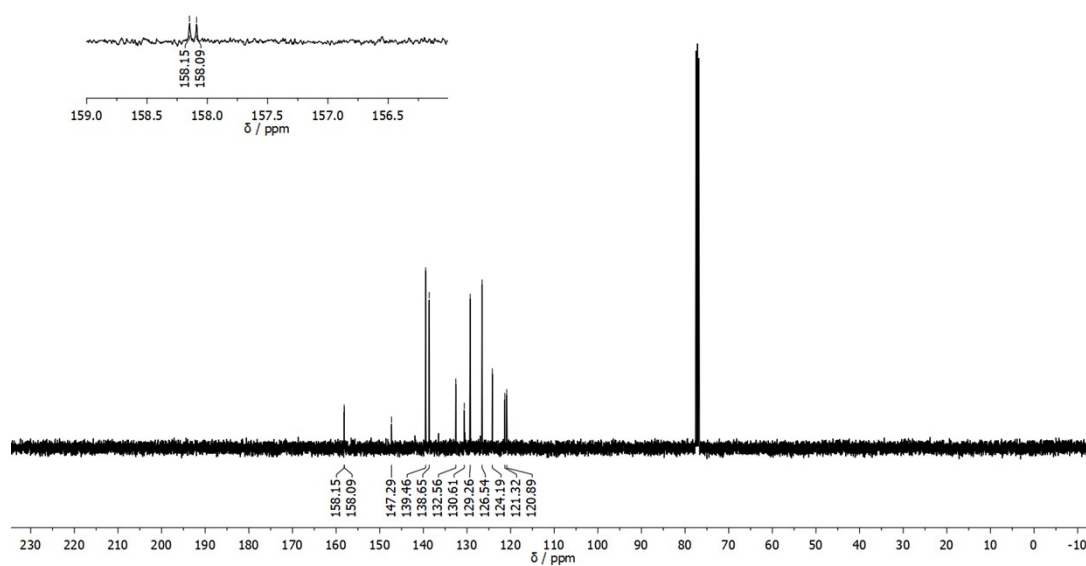

Figure S18. 101 MHz  $^{13}\text{C}$  NMR of 7 in  $\text{CDCl}_3$ .

### 3.6 Characterization of 8

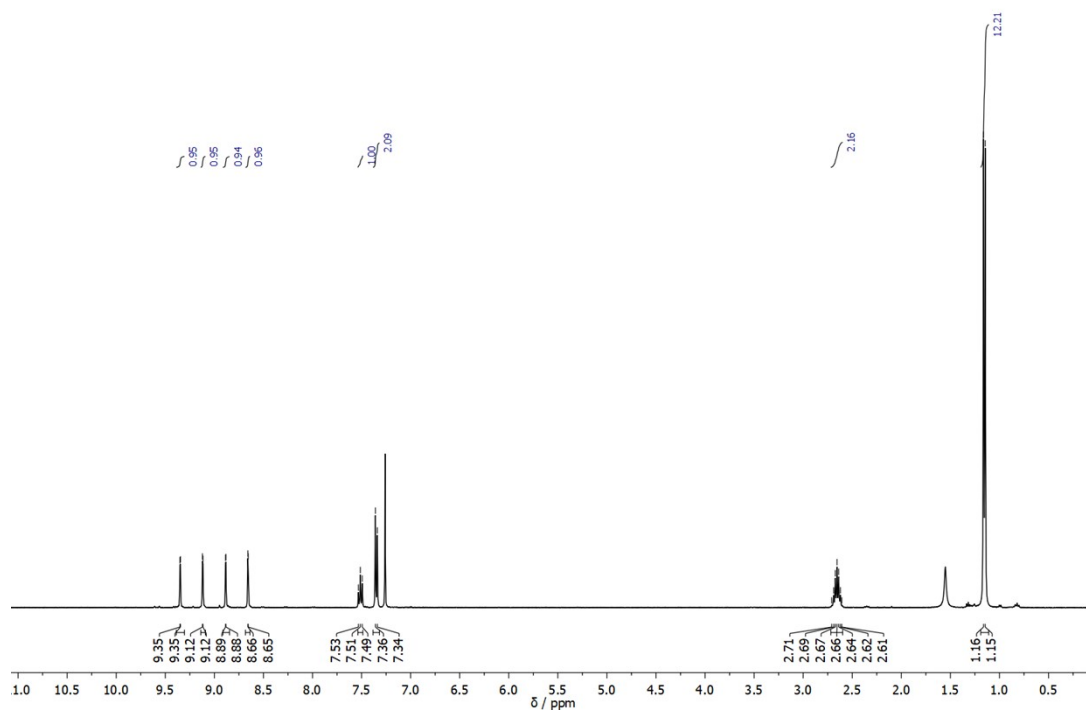

Figure S19. 400 MHz  $^1\text{H}$  NMR of **8** in  $\text{CDCl}_3$ .

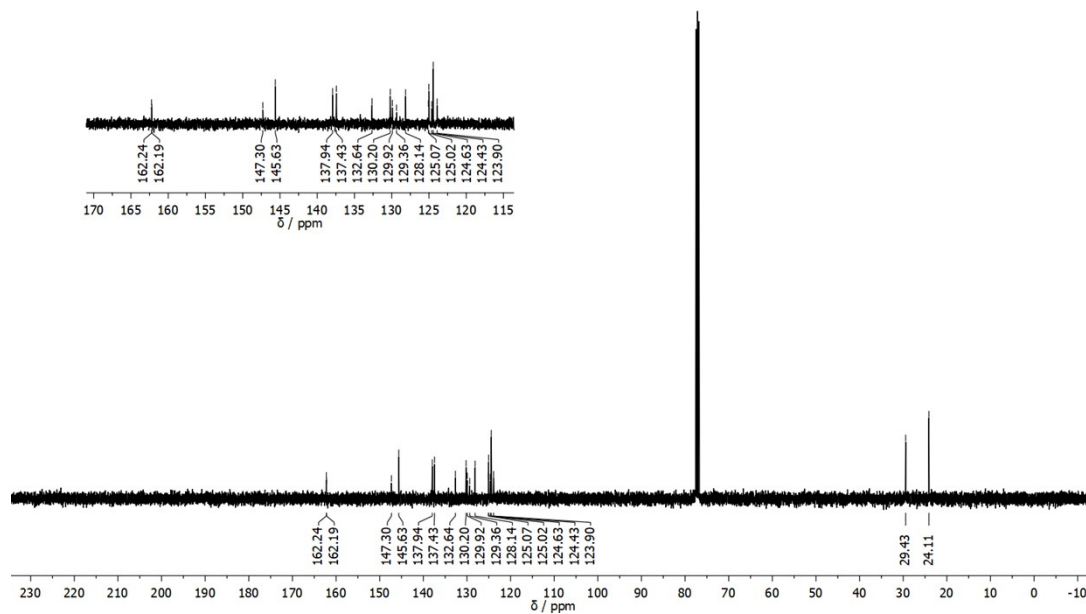

Figure S20. 101 MHz  $^{13}\text{C}$  NMR of **8** in  $\text{CDCl}_3$ .

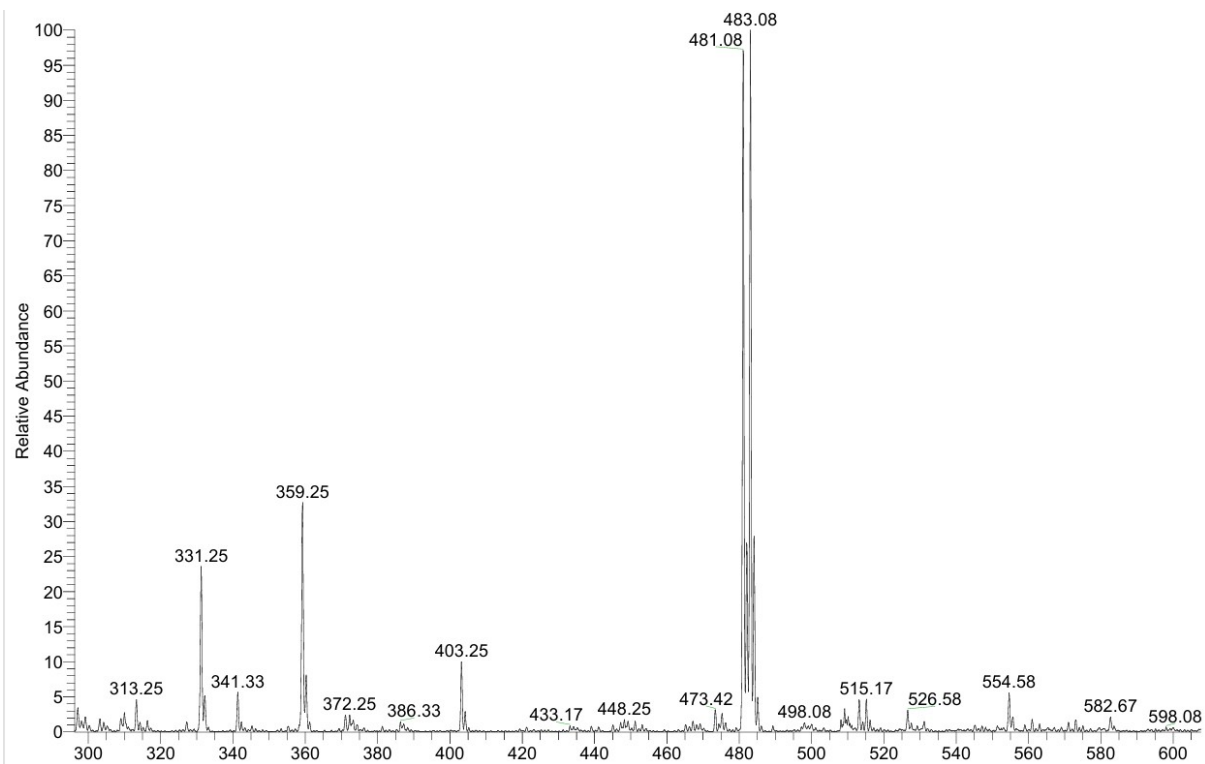

Figure S21. ESI-LRMS of 8.

### 3.7 Characterization of 9

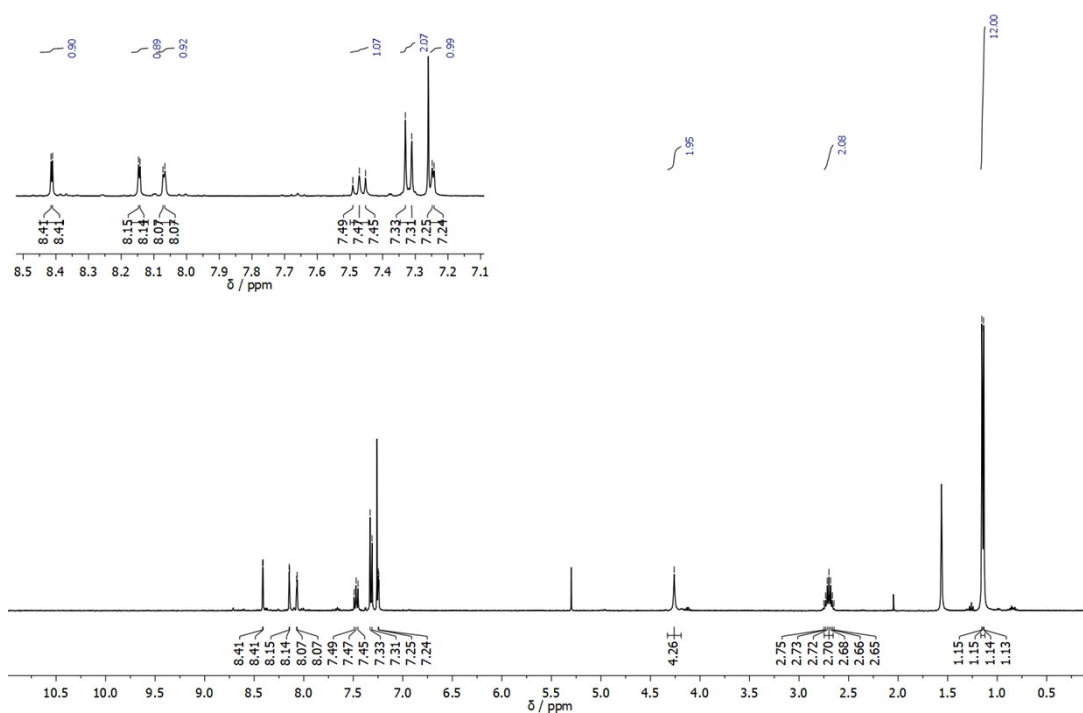

Figure S22. 400 MHz <sup>1</sup>H NMR of 9 in CDCl<sub>3</sub>.

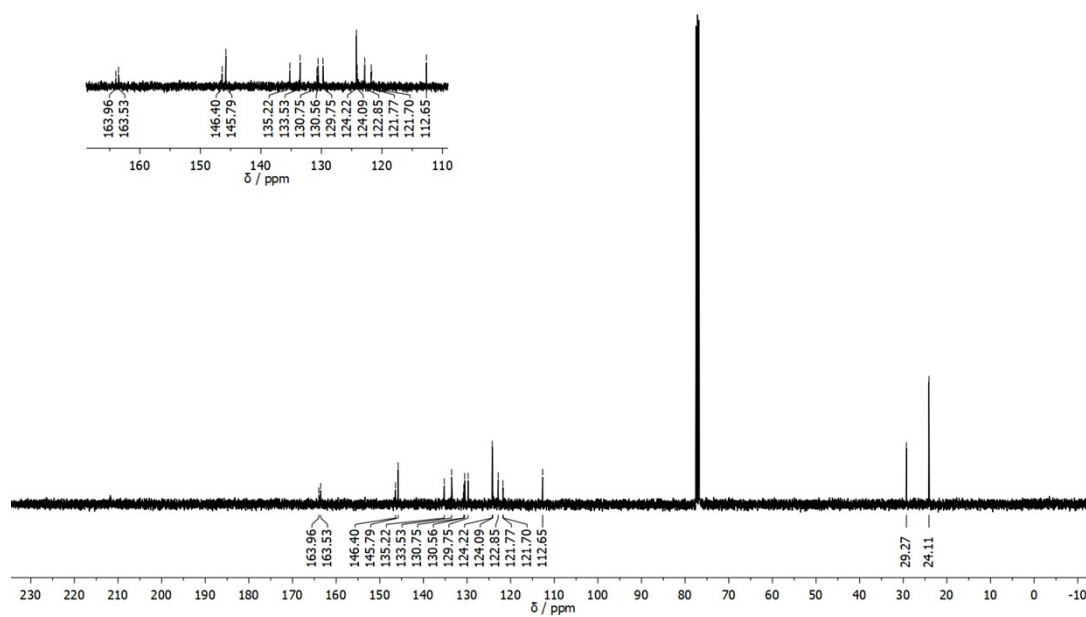

Figure S23. 101 MHz  $^{13}\text{C}$  NMR of **9** in  $\text{CDCl}_3$ .

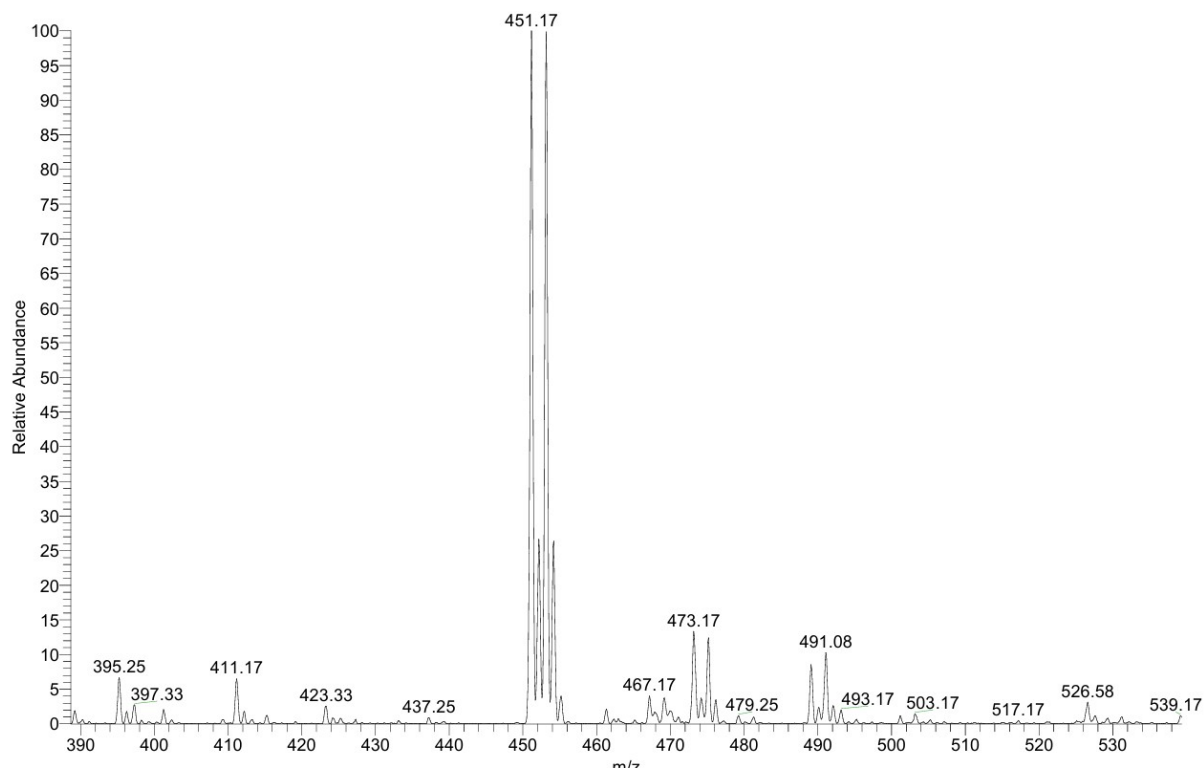

Figure S24. ESI-LRMS of **9**.

### 3.8 Characterization of 10

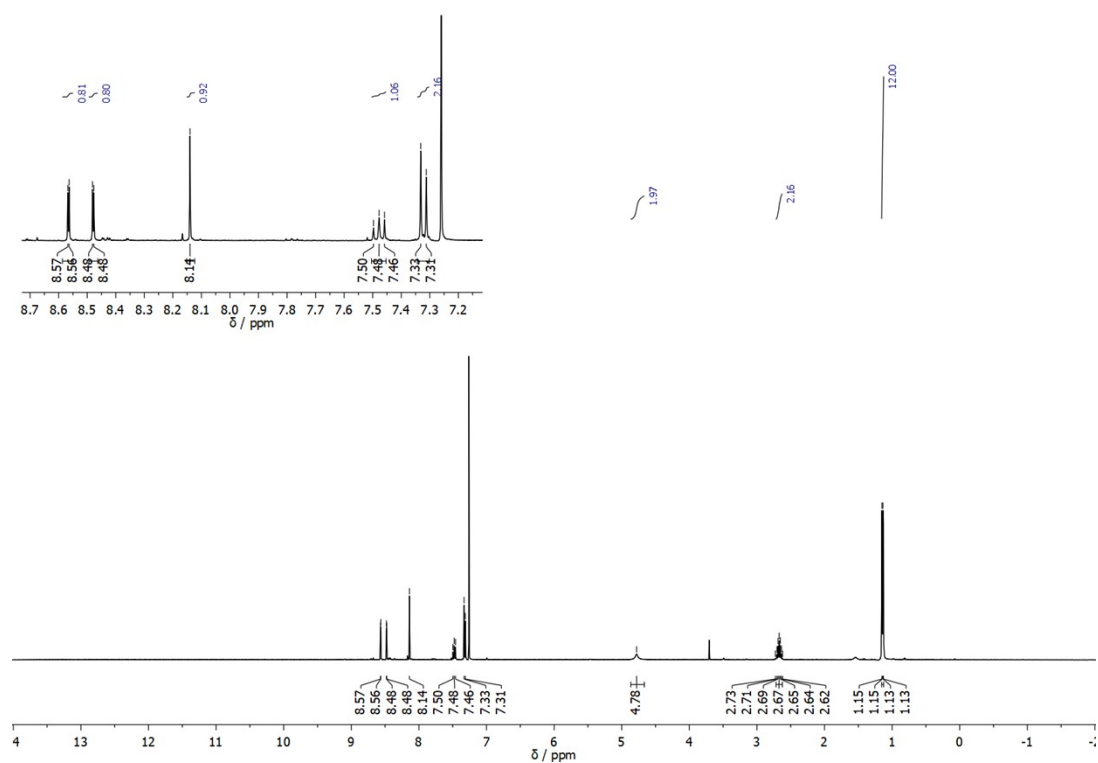

Figure S25. 400 MHz  $^1\text{H}$  NMR of 10 in  $\text{CDCl}_3$ .

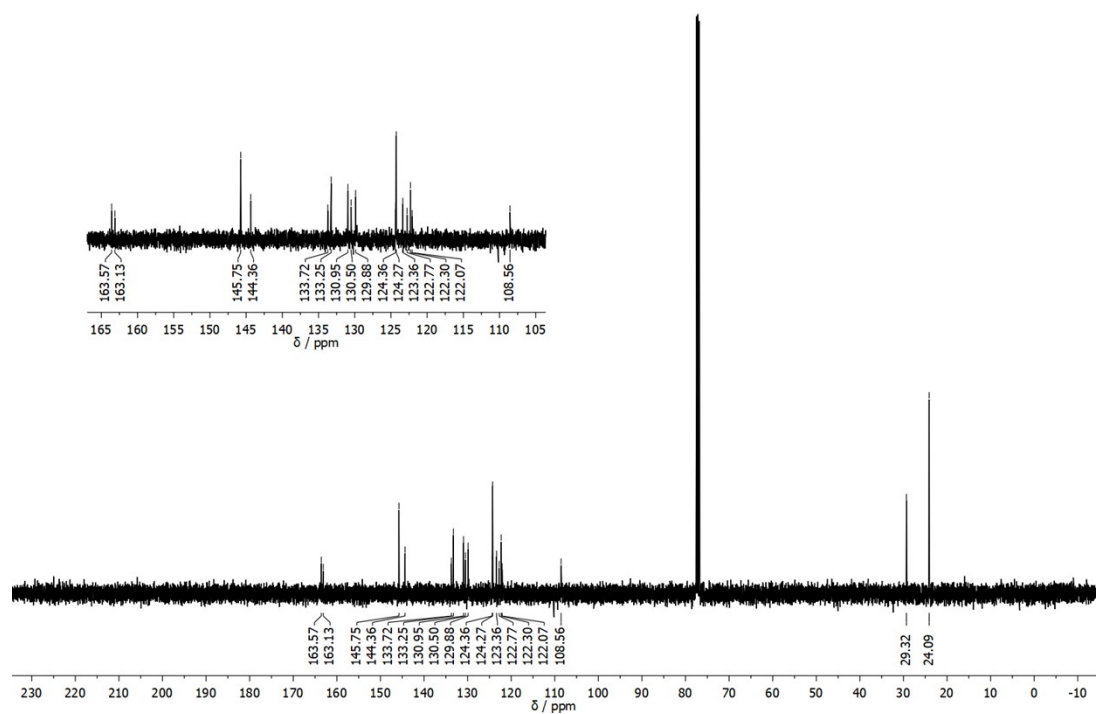

Figure S26. 101 MHz  $^{13}\text{C}$  NMR of 10 in  $\text{CDCl}_3$ .



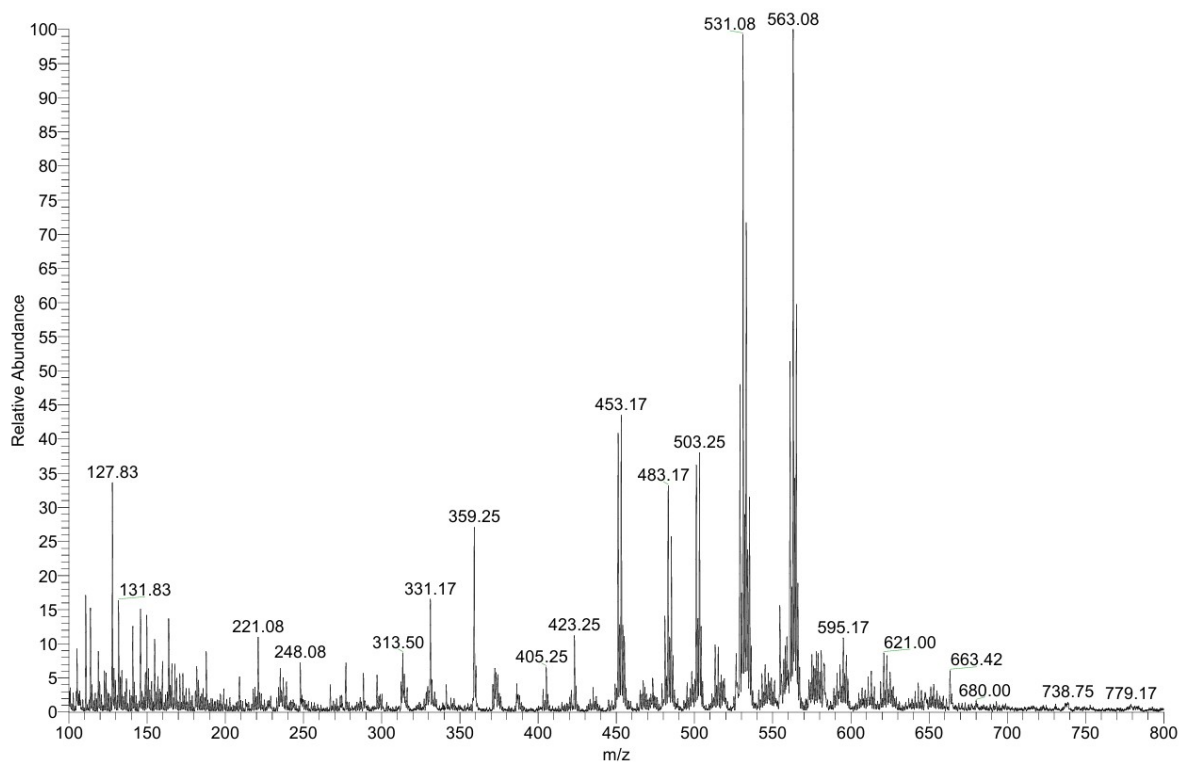

Figure S27. ESI-LRMS of 10.

#### 4 UV-Vis and electrochemistry studies

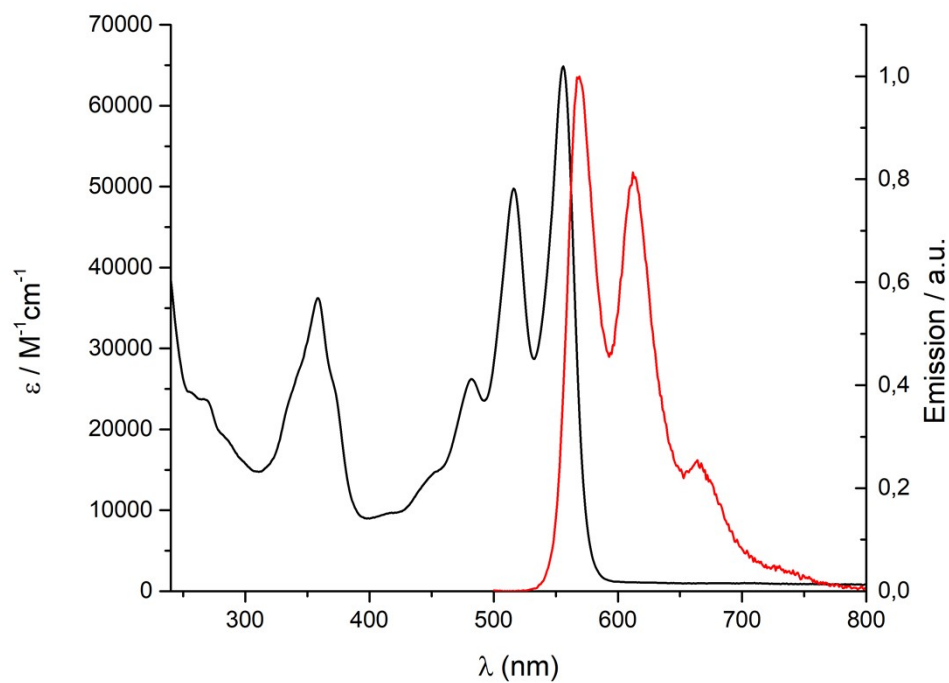

Figure S28. Absorption (black) and emission (red,  $\lambda_{\text{ex}}=375$  nm) spectra of 1 in  $\text{CHCl}_3$ .

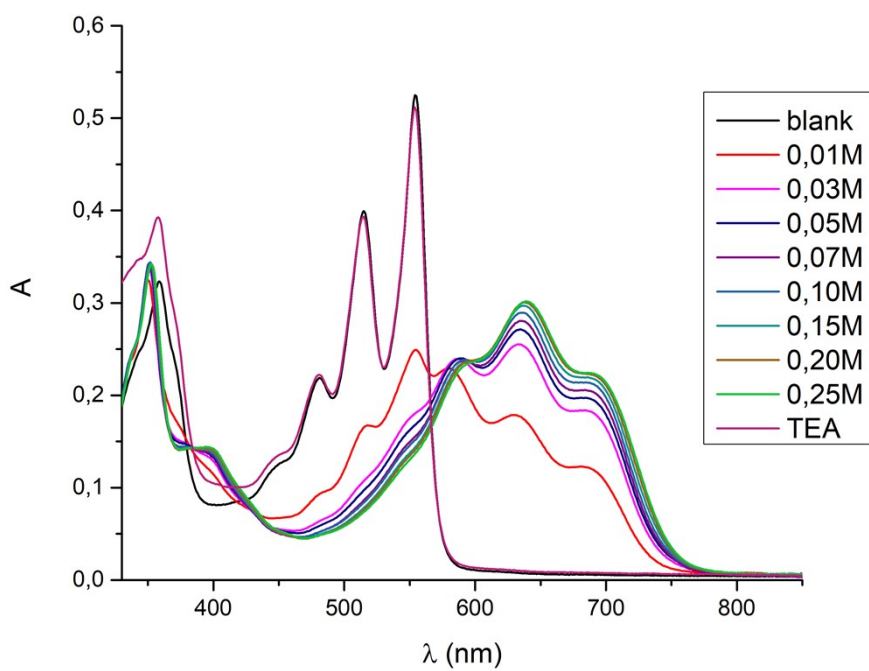

**Figure S29.** Absorption of **1** [ $7.3 \times 10^{-6}$  M] with increasing concentrations of TFA in  $\text{CH}_2\text{Cl}_2$ . Final point is obtained by adding an amount of TEA that results in a concentration [0.25 M] of base.

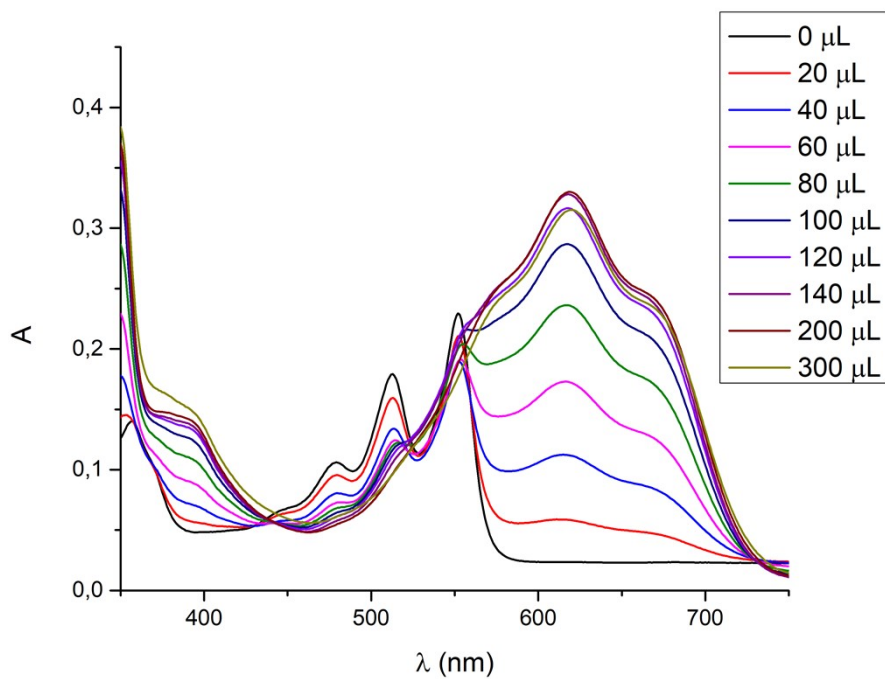

**Figure S30.** Absorption of **1** ( $1 \times 10^{-5}$  M) in THF upon addition of increasing amounts of  $\text{H}_2\text{SO}_4$ .

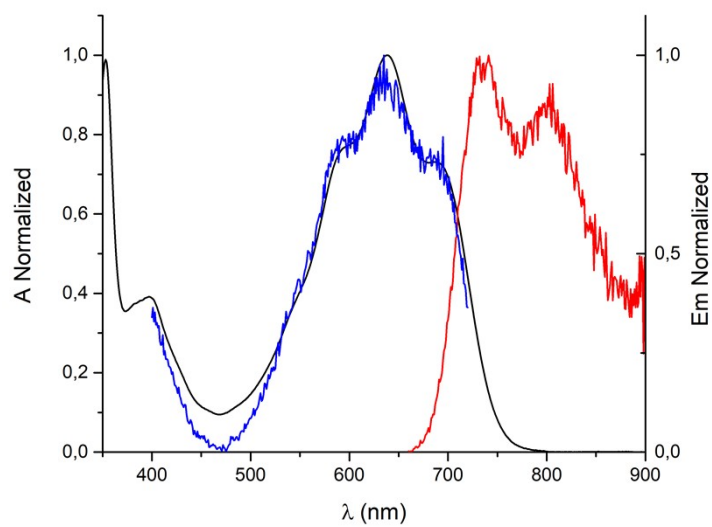

**Figure S31.** Absorption (black) and emission (red) of **1** in  $\text{CH}_2\text{Cl}_2$  with 0.2 M TFA. Excitation spectra (blue)  $\lambda_{\text{ex}} = 734$  nm is also reported.

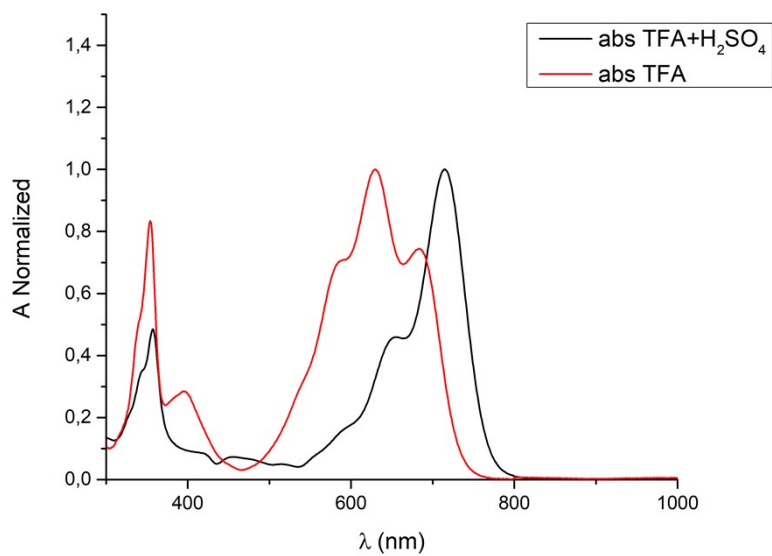

**Figure S32.** Absorption of **1** in TFA (red) and TFA with 0.2 M  $\text{H}_2\text{SO}_4$  added (black).

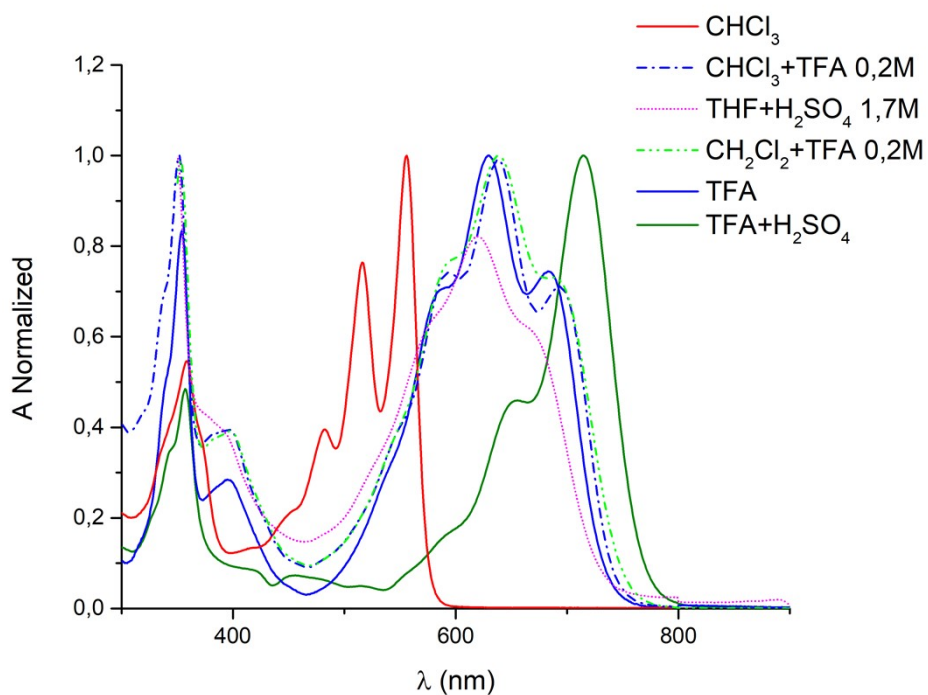

**Figure S33.** Absorption of **1** in different solvents and solvent/acid systems.

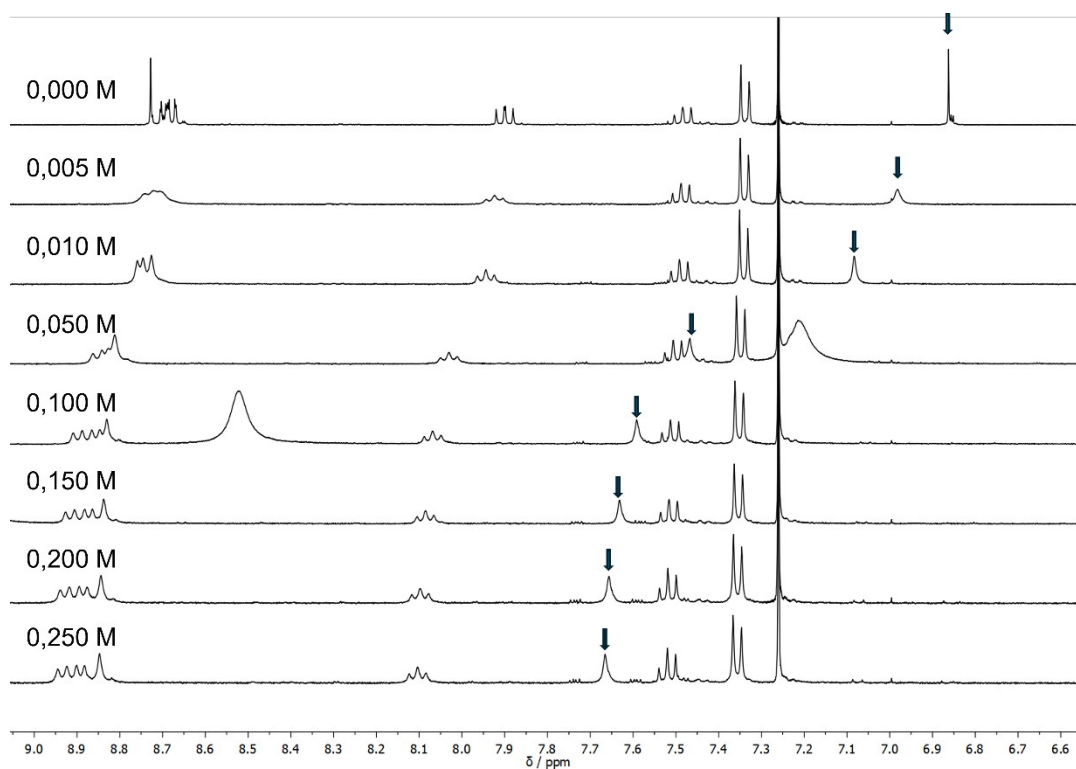

**Figure S34.**  $^1\text{H-NMR}$  400 MHz titration of **1** [ $3.2 \times 10^{-3}$  M] in  $\text{CDCl}_3$  with increasing concentrations of TFA. Diagnostic proton Ha is highlighted with the blue arrow.

## 5 Cyclic Voltammetry studies

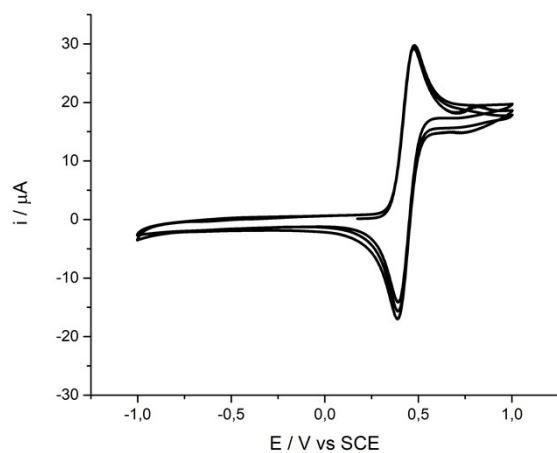

**Figure S35.** Cyclic voltammograms of **Fc** in  $\text{CH}_2\text{Cl}_2$  as reference. Scan rates:  $0.1 \text{ V s}^{-1}$ .  $\text{TBAPF}_6$  (0.1 M) is used as a supporting electrolyte  $E_{\text{ox}} \text{ Fc/Fc}^+ = +0.43 \text{ V vs SCE}$ .

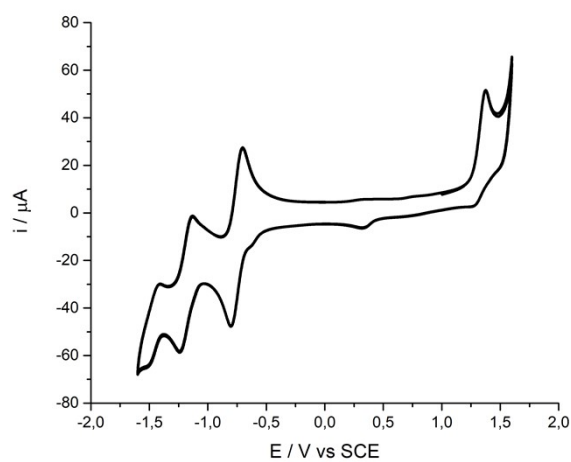

**Figure S36.** Cyclic voltammograms of **1** in  $\text{CH}_2\text{Cl}_2$  (ca. 1 mM). Scan rates:  $0.1 \text{ V s}^{-1}$ .  $\text{TBAPF}_6$  (0.1 M) is used as a supporting electrolyte.

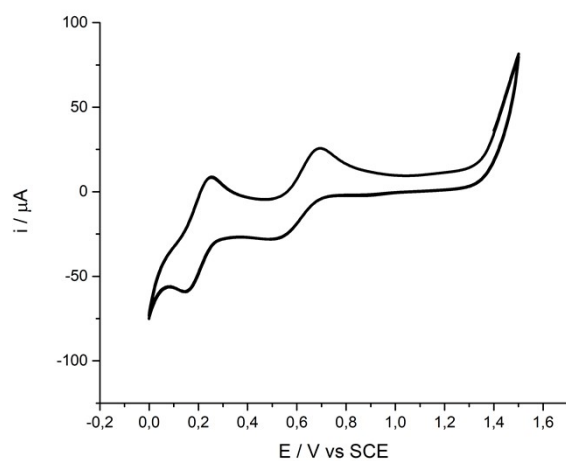

**Figure S37.** Cyclic voltammograms of **1** in CH<sub>2</sub>Cl<sub>2</sub> (ca. 1 mM) containing 0.2 M TFA. Scan rates: 0.1 V s<sup>-1</sup>. TBAPF<sub>6</sub> (0.1 M) is used as a supporting electrolyte.

## 6 Computational, Raman and two-dimensional electronic spectra

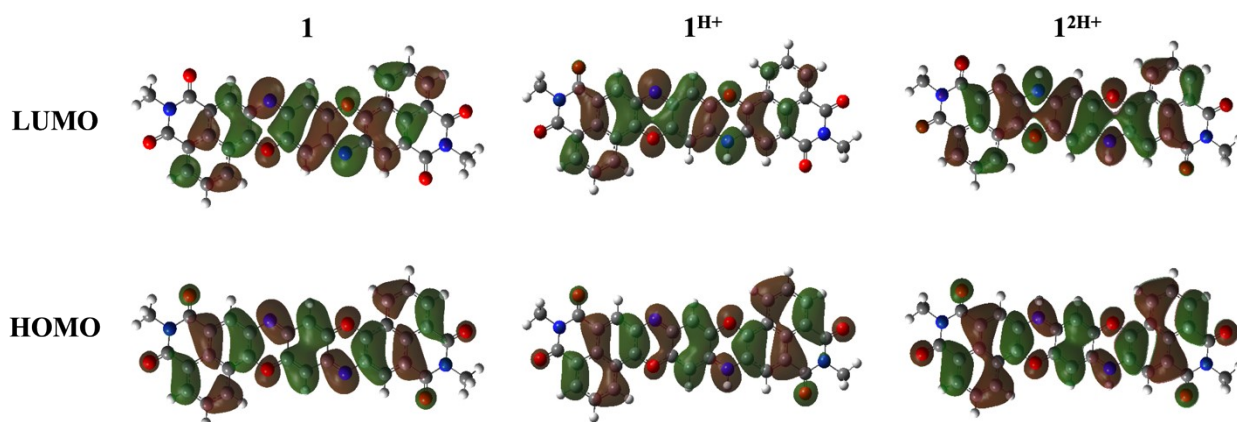

**Figure S38.** HOMO and LUMO molecular orbitals (MOs) attributable to the S<sub>1</sub> state for **1**, **1<sup>H+</sup>** and **1<sup>2H+</sup>**.

|                             |             |
|-----------------------------|-------------|
| HOMO <b>1</b>               | -6.70452 eV |
| LUMO <b>1</b>               | -2.13062 eV |
| HOMO <b>1<sup>H+</sup></b>  | -7.63214 eV |
| LUMO <b>1<sup>H+</sup></b>  | -3.48301 eV |
| HOMO <b>1<sup>2H+</sup></b> | -8.34425 eV |
| LUMO <b>1<sup>2H+</sup></b> | -4.92057 eV |

**Table S1.** Computed HOMO and LUMO values.

|                        | Vertical exc. energy | Oscillator strength | Reorganization energy | Vertical em. energy | Reorganization energy (with scaled gradients) | Vertical em. energy (with scaled gradients) |
|------------------------|----------------------|---------------------|-----------------------|---------------------|-----------------------------------------------|---------------------------------------------|
| <b>1</b>               | 2.48 eV / 499 nm     | 1.6526              | 0.33 eV               | 1.82 eV / 681 nm    | 0.19 eV                                       | 2.1 eV / 590 nm                             |
| <b>1<sup>H+</sup></b>  | 2.15 eV / 577 nm     | 1.5058              | 0.20 eV               | 1.75 eV / 708 nm    | 0.27 eV                                       | 1.61 eV / 770 nm                            |
| <b>1<sup>2H+</sup></b> | 1.61 eV / 767 nm     | 1.5983              | 0.18 eV               | 1.25 eV / 992 nm    | 0.10 eV                                       | 1.41 eV / 879 nm                            |

**Table S2.** Computed vertical excitation energies, oscillator strengths, reorganization energies and vertical emission energies for **1**, **1<sup>H+</sup>** and **1<sup>2H+</sup>**. To match experimental vibronic structure, we applied a broadening factor of 300 cm<sup>-1</sup> and scaling factors to S<sub>1</sub> energy gradients; in particular a scaling factor of 0.75 was applied to **1** and **1<sup>2H+</sup>** while a scaling factor of 1.15 was applied to **1<sup>H+</sup>** (Figure 2b of the main text).

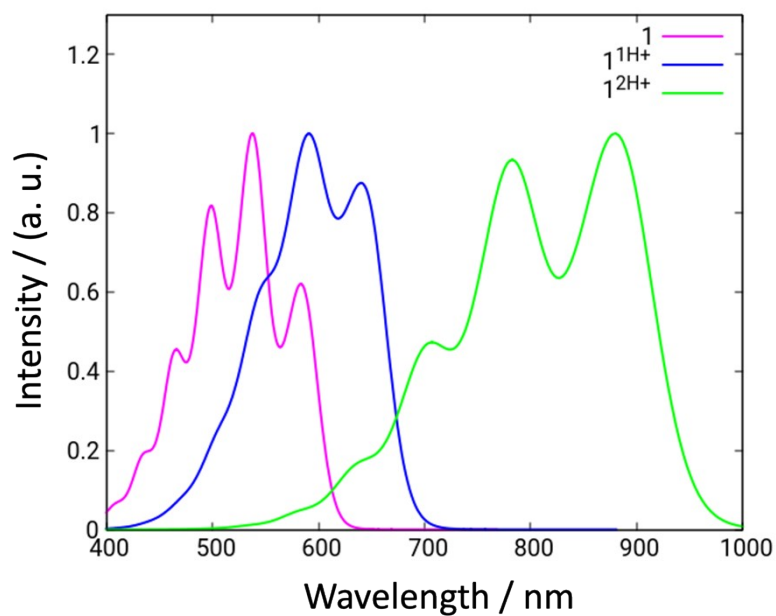

**Figure S39.** Computed vibronic spectra for **1**, **1<sup>1H+</sup>** and **1<sup>2H+</sup>** without scaling factors.

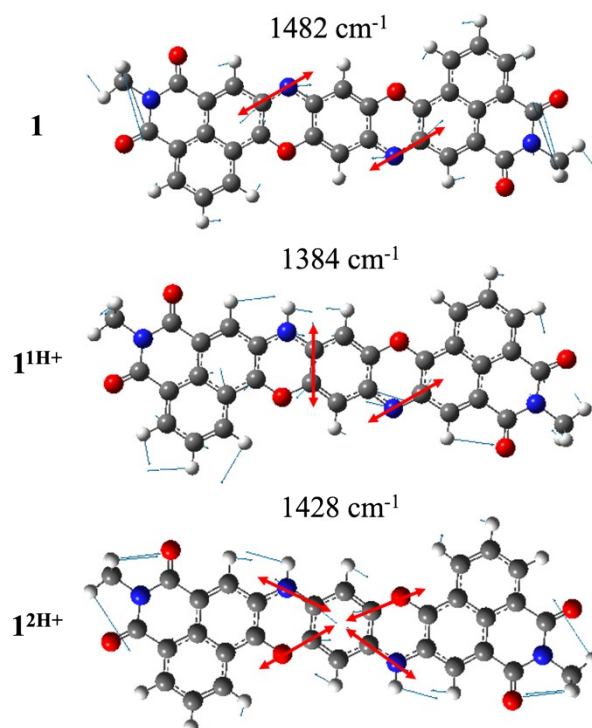

**Figure S40.** Dominant modes, highlighted with red double arrows only for the central aromatic core, which give rise to vibronic structure for **1**, **1<sup>1H+</sup>**, **1<sup>2H+</sup>**.

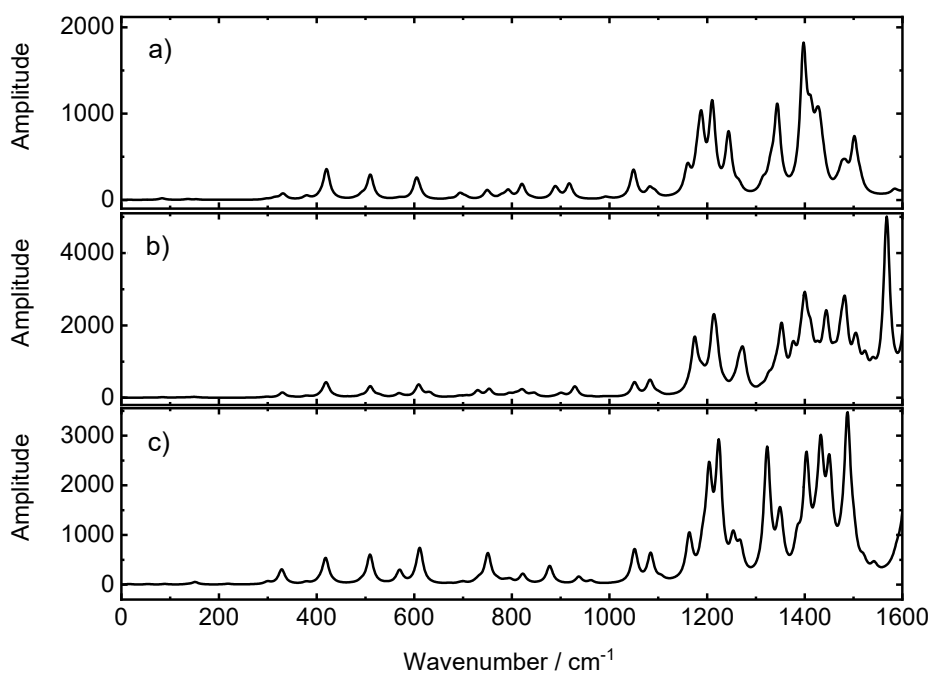

**Figure S41.** Calculated vibrational spectra on the  $S_0$  state for **1** (a), **1<sup>1H+</sup>** (b) and **1<sup>2H+</sup>** (c).

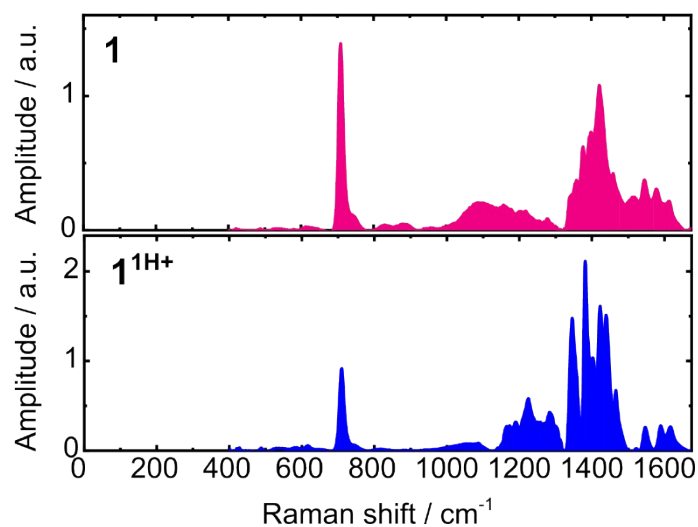

**Figure S42.** Raman spectra derived from CARS spectra after removal of the non-resonant background showing ground state vibrational frequencies for **1** (top) and **1<sup>1H+</sup>** (bottom). The peak at 700 cm<sup>-1</sup> is attributed to the dichloromethane solvent. It was not possible to measure the Raman shift spectrum for **1<sup>2H+</sup>** due to experimental limitations, but this has no bearing on the interpretation of results. All five ground state vibrational spectra (computational spectra for **1**, **1<sup>1H+</sup>** and **1<sup>2H+</sup>** as well as Raman spectra for **1** and **1<sup>1H+</sup>**) reveal a dense manifold of high-frequency vibrations, suggesting that the same would be observed via Raman spectroscopy of **1<sup>2H+</sup>**.



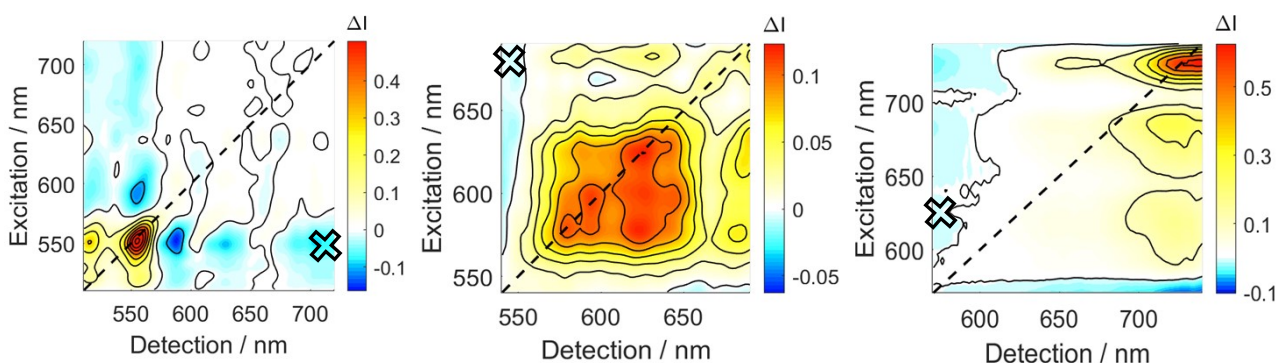

**Figure S43.** Two-dimensional electronic spectra for **1** (left), **1<sup>H+</sup>** (middle) and **1<sup>2H+</sup>** (right) at  $t_2 = 100$  fs. Positive peaks arise from ground state bleach and stimulated emission features while negative signals arise from excited state absorption. Black crosses on each map denote the point on the map for which kinetics were extracted for Fourier transformation to give the impulsive  $S_1$  vibrational spectra in Figure 4.

#### $S_0$ minimum **1**

|   |           |           |           |
|---|-----------|-----------|-----------|
| C | -7.231789 | 1.148653  | -0.001154 |
| C | -7.292177 | 2.526197  | -0.001364 |
| C | -5.982281 | 0.490187  | -0.001251 |
| C | -6.109344 | 3.291466  | -0.001669 |
| C | -4.879792 | 2.674532  | -0.001763 |
| C | -4.792814 | 1.260764  | -0.001558 |
| C | -5.917384 | -0.927064 | -0.001036 |
| C | -4.701906 | -1.564420 | -0.001127 |
| C | -3.495030 | -0.827081 | -0.001425 |
| C | -3.560999 | 0.558107  | -0.001627 |
| C | -8.491931 | 0.364706  | -0.000818 |
| C | -7.163055 | -1.725129 | -0.000710 |
| N | -8.369991 | -1.026253 | -0.000610 |
| O | -9.585222 | 0.901359  | -0.000764 |
| O | -7.166285 | -2.943196 | -0.000560 |
| O | -2.425872 | 1.304273  | -0.001913 |
| N | -2.283856 | -1.505819 | -0.001510 |
| C | -1.218445 | 0.677350  | -0.001776 |
| C | -1.201686 | -0.788816 | -0.001678 |
| C | -0.093323 | 1.422499  | -0.001769 |
| C | 1.201682  | 0.788831  | -0.001719 |
| C | 1.218441  | -0.677335 | -0.001738 |
| C | 0.093320  | -1.422483 | -0.001696 |
| N | 2.283853  | 1.505835  | -0.001588 |
| O | 2.425868  | -1.304258 | -0.001839 |
| C | 3.495027  | 0.827096  | -0.001463 |
| C | 3.560996  | -0.558092 | -0.001586 |
| C | 4.701902  | 1.564435  | -0.001206 |
| C | 5.917381  | 0.927078  | -0.001068 |
| C | 5.982276  | -0.490172 | -0.001186 |
| C | 4.792810  | -1.260750 | -0.001463 |
| C | 4.879789  | -2.674518 | -0.001582 |
| C | 6.109341  | -3.291451 | -0.001425 |

|   |            |           |           |
|---|------------|-----------|-----------|
| C | 7.292174   | -2.526182 | -0.001131 |
| C | 7.231784   | -1.148638 | -0.001012 |
| C | 7.163051   | 1.725144  | -0.000803 |
| C | 8.491926   | -0.364693 | -0.000673 |
| O | 7.166276   | 2.943212  | -0.000719 |
| O | 9.585210   | -0.901359 | -0.000470 |
| N | 8.369986   | 1.026269  | -0.000596 |
| H | -8.271140  | 3.004827  | -0.001284 |
| H | -6.172428  | 4.379912  | -0.001828 |
| H | -3.962034  | 3.261478  | -0.001998 |
| H | -4.652141  | -2.652809 | -0.000964 |
| H | -0.134687  | 2.510592  | -0.001798 |
| H | 0.134683   | -2.510576 | -0.001668 |
| H | 4.652137   | 2.652825  | -0.001120 |
| H | 3.962031   | -3.261464 | -0.001801 |
| H | 6.172426   | -4.379897 | -0.001520 |
| H | 8.271138   | -3.004812 | -0.000984 |
| C | 9.584906   | 1.837556  | -0.000310 |
| H | 9.605201   | 2.480769  | -0.889568 |
| H | 9.605042   | 2.480426  | 0.889200  |
| H | 10.440722  | 1.158991  | -0.000350 |
| C | -9.584912  | -1.837537 | -0.000309 |
| H | -9.605271  | -2.480696 | -0.889607 |
| H | -9.604989  | -2.480463 | 0.889160  |
| H | -10.440726 | -1.158969 | -0.000267 |

#### S<sub>1</sub> minimum 1

|   |           |           |           |
|---|-----------|-----------|-----------|
| C | -7.219869 | 1.142474  | -0.001097 |
| C | -7.277975 | 2.525381  | -0.001215 |
| C | -5.979201 | 0.482785  | -0.001119 |
| C | -6.094191 | 3.284792  | -0.001331 |
| C | -4.865406 | 2.663054  | -0.001341 |
| C | -4.781447 | 1.247196  | -0.001240 |
| C | -5.917731 | -0.941156 | -0.001042 |
| C | -4.714340 | -1.587712 | -0.001087 |
| C | -3.480557 | -0.865835 | -0.001187 |
| C | -3.553701 | 0.550016  | -0.001262 |
| C | -8.485469 | 0.365239  | -0.000930 |
| C | -7.171518 | -1.732105 | -0.000927 |
| N | -8.373223 | -1.026307 | -0.000978 |
| O | -9.574390 | 0.909563  | -0.001235 |
| O | -7.180429 | -2.949541 | -0.001134 |
| O | -2.425293 | 1.288622  | -0.001375 |
| N | -2.315498 | -1.537670 | -0.001211 |
| C | -1.216576 | 0.639839  | -0.001351 |
| C | -1.193409 | -0.787140 | -0.001279 |
| C | -0.079895 | 1.408223  | -0.001398 |
| C | 1.193405  | 0.787156  | -0.001375 |
| C | 1.216572  | -0.639824 | -0.001320 |
| C | 0.079891  | -1.408208 | -0.001274 |
| N | 2.315494  | 1.537686  | -0.001397 |
| O | 2.425289  | -1.288607 | -0.001311 |

|   |            |           |           |
|---|------------|-----------|-----------|
| C | 3.480553   | 0.865850  | -0.001337 |
| C | 3.553697   | -0.550001 | -0.001287 |
| C | 4.714336   | 1.587727  | -0.001318 |
| C | 5.917727   | 0.941171  | -0.001252 |
| C | 5.979196   | -0.482770 | -0.001186 |
| C | 4.781442   | -1.247181 | -0.001215 |
| C | 4.865402   | -2.663039 | -0.001163 |
| C | 6.094186   | -3.284777 | -0.001073 |
| C | 7.277971   | -2.525366 | -0.001024 |
| C | 7.219864   | -1.142459 | -0.001081 |
| C | 7.171514   | 1.732120  | -0.001272 |
| C | 8.485465   | -0.365225 | -0.000992 |
| O | 7.180425   | 2.949556  | -0.001118 |
| O | 9.574385   | -0.909550 | -0.000852 |
| N | 8.373218   | 1.026322  | -0.001075 |
| H | -8.255960  | 3.005744  | -0.001195 |
| H | -6.152379  | 4.373606  | -0.001413 |
| H | -3.946358  | 3.248020  | -0.001435 |
| H | -4.673463  | -2.676378 | -0.001033 |
| H | -0.138524  | 2.495754  | -0.001444 |
| H | 0.138520   | -2.495739 | -0.001224 |
| H | 4.673459   | 2.676393  | -0.001369 |
| H | 3.946353   | -3.248005 | -0.001191 |
| H | 6.152374   | -4.373591 | -0.001029 |
| H | 8.255955   | -3.005729 | -0.000937 |
| C | 9.593532   | 1.829851  | -0.000946 |
| H | 9.617638   | 2.472598  | -0.890418 |
| H | 9.617514   | 2.472527  | 0.888583  |
| H | 10.445016  | 1.145863  | -0.000905 |
| C | -9.593537  | -1.829836 | -0.001092 |
| H | -9.617538  | -2.472497 | -0.890629 |
| H | -9.617625  | -2.472596 | 0.888372  |
| H | -10.445020 | -1.145847 | -0.001096 |

S<sub>0</sub> minimum **1<sup>1H+</sup>**

|   |          |           |           |
|---|----------|-----------|-----------|
| C | 7.237291 | -1.128524 | 0.000084  |
| C | 7.305674 | -2.508340 | 0.000459  |
| C | 5.987007 | -0.482343 | -0.000022 |
| C | 6.131700 | -3.282736 | 0.000714  |
| C | 4.896369 | -2.675056 | 0.000624  |
| C | 4.806073 | -1.263898 | 0.000266  |
| C | 5.919265 | 0.943211  | -0.000385 |
| C | 4.716337 | 1.585259  | -0.000432 |
| C | 3.505358 | 0.836619  | -0.000141 |
| C | 3.575439 | -0.559134 | 0.000185  |
| C | 8.496771 | -0.339325 | -0.000199 |
| C | 7.170544 | 1.745424  | -0.000718 |
| N | 8.374684 | 1.051724  | -0.000856 |
| O | 9.587215 | -0.877143 | 0.000094  |
| O | 7.159213 | 2.961707  | -0.000891 |
| O | 2.439197 | -1.284654 | 0.000457  |
| N | 2.309111 | 1.488340  | -0.000183 |
| C | 1.249684 | -0.676296 | 0.000413  |

|   |            |           |           |
|---|------------|-----------|-----------|
| C | 1.214068   | 0.770251  | 0.000079  |
| C | 0.113562   | -1.445826 | 0.000650  |
| C | -1.132076  | -0.800661 | 0.000601  |
| C | -1.196589  | 0.649962  | 0.000279  |
| C | -0.073318  | 1.401610  | 0.000030  |
| N | -2.282299  | -1.474496 | 0.000808  |
| O | -2.406618  | 1.274394  | 0.000301  |
| C | -3.530470  | -0.837738 | 0.000566  |
| C | -3.557945  | 0.541480  | 0.000318  |
| C | -4.726597  | -1.575633 | 0.000496  |
| C | -5.931661  | -0.916645 | 0.000230  |
| C | -5.978227  | 0.497207  | 0.000035  |
| C | -4.779586  | 1.254339  | 0.000074  |
| C | -4.849700  | 2.670587  | -0.000120 |
| C | -6.072518  | 3.297332  | -0.000334 |
| C | -7.265676  | 2.544531  | -0.000381 |
| C | -7.221948  | 1.168083  | -0.000209 |
| C | -7.186235  | -1.704928 | 0.000092  |
| C | -8.490085  | 0.395820  | -0.000304 |
| O | -7.189505  | -2.923034 | 0.000177  |
| O | -9.576637  | 0.943144  | -0.000451 |
| N | -8.383144  | -0.997919 | -0.000219 |
| H | 8.287722   | -2.980466 | 0.000548  |
| H | 6.203415   | -4.370209 | 0.000989  |
| H | 3.983787   | -3.269932 | 0.000828  |
| H | 4.664289   | 2.672987  | -0.000691 |
| H | 0.184342   | -2.532867 | 0.000814  |
| H | -0.124143  | 2.488993  | -0.000182 |
| H | -4.712326  | -2.666032 | 0.000632  |
| H | -3.926886  | 3.249061  | -0.000090 |
| H | -6.125148  | 4.386123  | -0.000473 |
| H | -8.237705  | 3.036897  | -0.000557 |
| C | -9.606903  | -1.797555 | -0.000382 |
| H | -9.633688  | -2.438400 | -0.890979 |
| H | -9.633172  | -2.439457 | 0.889450  |
| H | -10.455961 | -1.110796 | 0.000224  |
| C | 9.589861   | 1.865276  | -0.001258 |
| H | 9.607554   | 2.507085  | -0.891242 |
| H | 9.609021   | 2.506005  | 0.889496  |
| H | 10.446740  | 1.188385  | -0.002303 |
| H | -2.262055  | -2.490318 | 0.001315  |

S<sub>1</sub> minimum **1<sup>1H+</sup>**

|   |          |           |           |
|---|----------|-----------|-----------|
| C | 7.238871 | -1.115644 | -0.000052 |
| C | 7.309067 | -2.499712 | 0.000292  |
| C | 5.993274 | -0.470635 | -0.000126 |
| C | 6.136331 | -3.273743 | 0.000541  |
| C | 4.900815 | -2.664867 | 0.000468  |
| C | 4.805788 | -1.250013 | 0.000141  |
| C | 5.921191 | 0.954323  | -0.000435 |
| C | 4.714141 | 1.590766  | -0.000475 |
| C | 3.493401 | 0.852620  | -0.000238 |

|   |            |           |           |
|---|------------|-----------|-----------|
| C | 3.573858   | -0.563756 | 0.000068  |
| C | 8.498737   | -0.326677 | -0.000363 |
| C | 7.170002   | 1.756860  | -0.000684 |
| N | 8.376090   | 1.063215  | -0.000624 |
| O | 9.589253   | -0.865604 | 0.000118  |
| O | 7.161119   | 2.973627  | -0.000604 |
| O | 2.451713   | -1.308222 | 0.000313  |
| N | 2.318326   | 1.513881  | -0.000305 |
| C | 1.243599   | -0.669248 | 0.000236  |
| C | 1.207040   | 0.755861  | -0.000077 |
| C | 0.109667   | -1.449970 | 0.000456  |
| C | -1.138511  | -0.817749 | 0.000373  |
| C | -1.197500  | 0.599163  | 0.000065  |
| C | -0.066314  | 1.373390  | -0.000151 |
| N | -2.322472  | -1.514943 | 0.000541  |
| O | -2.408711  | 1.236749  | -0.000023 |
| C | -3.528729  | -0.885125 | 0.000362  |
| C | -3.549348  | 0.525247  | 0.000073  |
| C | -4.747408  | -1.602289 | 0.000456  |
| C | -5.936311  | -0.926242 | 0.000279  |
| C | -5.972913  | 0.496020  | -0.000016 |
| C | -4.767300  | 1.242760  | -0.000101 |
| C | -4.825390  | 2.657505  | -0.000343 |
| C | -6.047101  | 3.295235  | -0.000514 |
| C | -7.240546  | 2.553215  | -0.000471 |
| C | -7.204823  | 1.169462  | -0.000236 |
| C | -7.204289  | -1.702988 | 0.000482  |
| C | -8.482429  | 0.408813  | -0.000330 |
| O | -7.211965  | -2.919576 | 0.000366  |
| O | -9.559751  | 0.970747  | -0.000328 |
| N | -8.391785  | -0.985477 | 0.000118  |
| H | 8.292063   | -2.970018 | 0.000339  |
| H | 6.207599   | -4.361327 | 0.000792  |
| H | 3.988040   | -3.259375 | 0.000666  |
| H | 4.660929   | 2.678548  | -0.000698 |
| H | 0.193568   | -2.536377 | 0.000673  |
| H | -0.133847  | 2.459945  | -0.000385 |
| H | -4.747608  | -2.692476 | 0.000684  |
| H | -3.899362  | 3.230741  | -0.000390 |
| H | -6.090208  | 4.384249  | -0.000705 |
| H | -8.210163  | 3.050089  | -0.000651 |
| C | -9.624720  | -1.772479 | 0.000156  |
| H | -9.657098  | -2.412534 | -0.890649 |
| H | -9.656813  | -2.412806 | 0.890765  |
| H | -10.466517 | -1.076884 | 0.000361  |
| C | 9.590563   | 1.877386  | -0.000670 |
| H | 9.608399   | 2.519348  | -0.890594 |
| H | 9.609231   | 2.518368  | 0.889960  |
| H | 10.447977  | 1.201096  | -0.001392 |
| H | -2.298249  | -2.530998 | 0.000812  |

S<sub>0</sub> minimum **1<sup>2H+</sup>**

|   |           |          |           |
|---|-----------|----------|-----------|
| C | -7.224019 | 1.142964 | 0.000164  |
| C | -7.278764 | 2.521047 | -0.032926 |

|   |            |           |           |
|---|------------|-----------|-----------|
| C | -5.978075  | 0.486550  | -0.007930 |
| C | -6.095334  | 3.284170  | -0.074922 |
| C | -4.865341  | 2.669327  | -0.082430 |
| C | -4.788062  | 1.255943  | -0.048943 |
| C | -5.924155  | -0.932978 | 0.025531  |
| C | -4.727854  | -1.594693 | 0.016370  |
| C | -3.533605  | -0.844963 | -0.023788 |
| C | -3.568823  | 0.541665  | -0.052530 |
| C | -8.489709  | 0.363023  | 0.045757  |
| C | -7.181168  | -1.729110 | 0.071865  |
| N | -8.377687  | -1.030157 | 0.079601  |
| O | -9.574211  | 0.908908  | 0.053845  |
| O | -7.165428  | -2.944581 | 0.102203  |
| O | -2.413820  | 1.256998  | -0.083678 |
| N | -2.291045  | -1.457391 | -0.037247 |
| C | -1.219292  | 0.661153  | -0.077123 |
| C | -1.145899  | -0.792773 | -0.064920 |
| C | -0.095288  | 1.432587  | -0.078164 |
| C | 1.160081   | 0.793341  | -0.064923 |
| C | 1.233473   | -0.660587 | -0.077059 |
| C | 0.109469   | -1.432020 | -0.078098 |
| N | 2.305225   | 1.457957  | -0.037249 |
| O | 2.427999   | -1.256433 | -0.083554 |
| C | 3.547784   | 0.845529  | -0.023741 |
| C | 3.583003   | -0.541100 | -0.052419 |
| C | 4.742035   | 1.595260  | 0.016388  |
| C | 5.938335   | 0.933544  | 0.025593  |
| C | 5.992252   | -0.485986 | -0.007791 |
| C | 4.802240   | -1.255379 | -0.048779 |
| C | 4.879516   | -2.668765 | -0.082191 |
| C | 6.109507   | -3.283611 | -0.074633 |
| C | 7.292938   | -2.520487 | -0.032656 |
| C | 7.238195   | -1.142402 | 0.000357  |
| C | 7.195350   | 1.729677  | 0.071881  |
| C | 8.503886   | -0.362460 | 0.045927  |
| O | 7.179604   | 2.945151  | 0.102125  |
| O | 9.588387   | -0.908346 | 0.054096  |
| N | 8.391868   | 1.030722  | 0.079668  |
| H | -8.255147  | 3.004639  | -0.025489 |
| H | -6.158695  | 4.371762  | -0.101115 |
| H | -3.949083  | 3.257249  | -0.113945 |
| H | -4.710886  | -2.684437 | 0.040433  |
| H | -0.176645  | 2.518919  | -0.084092 |
| H | 0.190830   | -2.518353 | -0.083967 |
| H | 4.725070   | 2.685006  | 0.040388  |
| H | 3.963255   | -3.256685 | -0.113688 |
| H | 6.172868   | -4.371204 | -0.100768 |
| H | 8.269319   | -3.004082 | -0.025172 |
| C | 9.612736   | 1.835918  | 0.126841  |
| H | 9.653628   | 2.499234  | -0.746297 |
| H | 9.615371   | 2.452747  | 1.034341  |
| H | 10.464975  | 1.153276  | 0.127280  |
| C | -9.598545  | -1.835363 | 0.126834  |
| H | -9.639560  | -2.498564 | -0.746387 |
| H | -9.601045  | -2.452310 | 1.034251  |
| H | -10.450788 | -1.152725 | 0.127469  |

|   |           |           |           |
|---|-----------|-----------|-----------|
| H | 2.279848  | 2.478480  | -0.017703 |
| H | -2.265655 | -2.477912 | -0.017681 |

S<sub>1</sub> minimum 1<sup>2H+</sup>

|   |           |           |           |
|---|-----------|-----------|-----------|
| C | -7.219963 | 1.137184  | 0.012760  |
| C | -7.271524 | 2.523577  | -0.015550 |
| C | -5.982984 | 0.479668  | -0.005284 |
| C | -6.090398 | 3.279764  | -0.062231 |
| C | -4.859730 | 2.656142  | -0.079392 |
| C | -4.786366 | 1.241956  | -0.051131 |
| C | -5.932585 | -0.941499 | 0.023525  |
| C | -4.736217 | -1.608106 | 0.004580  |
| C | -3.534142 | -0.876149 | -0.041491 |
| C | -3.566860 | 0.536006  | -0.064832 |
| C | -8.490808 | 0.363368  | 0.063778  |
| C | -7.192919 | -1.732386 | 0.075579  |
| N | -8.386650 | -1.028726 | 0.092317  |
| O | -9.569609 | 0.919540  | 0.080119  |
| O | -7.179635 | -2.947640 | 0.102538  |
| O | -2.427919 | 1.250452  | -0.100628 |
| N | -2.313954 | -1.491578 | -0.064389 |
| C | -1.220182 | 0.627286  | -0.099149 |
| C | -1.146834 | -0.791419 | -0.090366 |
| C | -0.092437 | 1.414704  | -0.100481 |
| C | 1.161016  | 0.791978  | -0.090397 |
| C | 1.234364  | -0.626727 | -0.099074 |
| C | 0.106619  | -1.414146 | -0.100372 |
| N | 2.328135  | 1.492139  | -0.064434 |
| O | 2.442101  | -1.249894 | -0.100481 |
| C | 3.548323  | 0.876710  | -0.041472 |
| C | 3.581042  | -0.535446 | -0.064722 |
| C | 4.750398  | 1.608669  | 0.004580  |
| C | 5.946765  | 0.942063  | 0.023585  |
| C | 5.997165  | -0.479105 | -0.005148 |
| C | 4.800546  | -1.241396 | -0.050970 |
| C | 4.873911  | -2.655583 | -0.079161 |
| C | 6.104579  | -3.279204 | -0.061961 |
| C | 7.285704  | -2.523016 | -0.015304 |
| C | 7.234143  | -1.136622 | 0.012942  |
| C | 7.207098  | 1.732952  | 0.075627  |
| C | 8.504988  | -0.362803 | 0.063939  |
| O | 7.193814  | 2.948207  | 0.102515  |
| O | 9.583788  | -0.918974 | 0.080307  |
| N | 8.400829  | 1.029293  | 0.092394  |
| H | -8.247483 | 3.007987  | -0.000232 |
| H | -6.147171 | 4.367725  | -0.084397 |
| H | -3.941788 | 3.241310  | -0.114370 |
| H | -4.725626 | -2.698000 | 0.025641  |
| H | -0.189038 | 2.499645  | -0.102902 |
| H | 0.203221  | -2.499086 | -0.102705 |
| H | 4.739809  | 2.698564  | 0.025582  |
| H | 3.955969  | -3.240753 | -0.114122 |
| H | 6.161352  | -4.367167 | -0.084079 |
| H | 8.261663  | -3.007424 | 0.000046  |
| C | 9.625438  | 1.829300  | 0.144170  |

|   |            |           |           |
|---|------------|-----------|-----------|
| H | 9.673847   | 2.489097  | -0.731178 |
| H | 9.624910   | 2.448617  | 1.049893  |
| H | 10.474746  | 1.143032  | 0.151852  |
| C | -9.611259  | -1.828730 | 0.144131  |
| H | -9.659730  | -2.488484 | -0.731246 |
| H | -9.610672  | -2.448090 | 1.049823  |
| H | -10.460563 | -1.142459 | 0.151897  |
| H | 2.295004   | 2.509760  | -0.047686 |
| H | -2.280824  | -2.509198 | -0.047578 |

## Energy gap law calculations

**Table S3.** Experimentally determined  $S_1$  decay rate, equal to the sum of radiative and nonradiative decay rates ( $k_r + k_{nr}$ ), and fluorescence quantum yield ( $\Phi_f$ ), which together with equation S1 (below) gives the rate of nonradiative decay  $k_{nr}$ . Experimentally determined  $S_0$ - $S_1$  energy gap values,  $\Delta E$ , theoretically determined dominant vibrational frequencies,  $\omega_{\text{theory}}$ , and experimentally determined vibrational frequencies,  $\omega_{\text{exp}}$ , are used to benchmark the trend in results against the Energy Gap Law.

| Molecule               | Exp. rate / $s^{-1}$  | $\Phi_f$ / a.u. | $k_{nr}$ / $s^{-1}$   | $\Delta E$ / nm | $\Delta E$ / eV | $\omega_{\text{theory}}$ / $cm^{-1}$ | $\omega_{\text{exp}}$ / $cm^{-1}$ |
|------------------------|-----------------------|-----------------|-----------------------|-----------------|-----------------|--------------------------------------|-----------------------------------|
| <b>1</b>               | $8.33 \times 10^8$    | 0.7             | $2.50 \times 10^8$    | 554             | 2.24            | 1482                                 | 1432                              |
| <b>1<sup>1H+</sup></b> | $1.09 \times 10^{10}$ | < 0.01          | $1.08 \times 10^{10}$ | 693             | 1.79            | 1384                                 | 1354                              |
| <b>1<sup>2H+</sup></b> | $3.70 \times 10^{10}$ | 0               | $3.70 \times 10^{10}$ | 715             | 1.73            | 1428                                 | 1426                              |

$$\Phi_f = \frac{k_r}{k_r + k_{nr}} \quad (\text{S1})$$

## 7 X-Ray diffraction

Data collections for **1**, **1Br** and **1•TFA** were performed at the XRD2 beamline of the Elettra Synchrotron, Trieste (Italy).<sup>5</sup> The crystals were dipped in NHV oil (Jena Bioscience, Jena, Germany) and mounted on the goniometer head with kapton loops (MiTeGen, Ithaca, USA). Complete datasets were collected at 100 K or 298 K (nitrogen stream supplied through an Oxford Cryostream 700) through the rotating crystal method. Data were acquired using monochromatic wavelength of 0.620 Å on a Pilatus 6M hybrid-pixel area detector (DECTRIS Ltd., Baden-Daettwil, Switzerland). The diffraction data were indexed, integrated and scaled using XDS.<sup>6</sup> Partial datasets, from randomly orientated crystals, have been merged with CCP4-Aimless code<sup>7,8</sup> to obtain complete sets of data for **1•TFA** triclinic polymorph ( $\alpha$ ). An alternative **1•TFA** monoclinic polymorph ( $\beta$ ) has been found but its crystals diffracted to a maximum resolution of  $\sim 1.0$  Å. The structures were solved by the dual space algorithm implemented in the SHELXT code.<sup>9</sup> Fourier analysis and refinement were performed by the full-matrix least-squares methods based on  $F^2$  implemented in SHELXL (Version 2018/3).<sup>10</sup> The Coot program was used for modeling.<sup>11</sup> Anisotropic thermal motion refinement have been used for all phenoxazine based moieties in all structures but **1•TFA** polymorph  $\beta$ , where only heteroatoms have been treated anisotropically to avoid overrefinement. Geometry and thermal motion parameters restrains (SIMU, DFIX, DANG and SAME) have been used on disordered molecules. Hydrogen atoms were included at calculated positions with isotropic  $U_{\text{factors}} = 1.2 \cdot U_{\text{eq}}$  or  $U_{\text{factors}} = 1.5 \cdot U_{\text{eq}}$  for methyl and hydroxyl groups ( $U_{\text{eq}}$  being the equivalent isotropic thermal factor of the bonded non hydrogen atom). Hydrogen atoms for water



molecules have not been included in the refined models since it was not possible to locate them unambiguously in electron-density peaks of Fourier difference maps. Pictures were prepared using Ortep-3<sup>12</sup>, CCDC Mercury<sup>13</sup> and Pymol<sup>14</sup> software. Essential crystal and refinement data are reported below (Table S3 - contribution of unmodeled atoms in disordered solvent is accounted therein).

Molecules have been crystallized in centrosymmetric space groups with half TPDO diimide molecule in the crystallographic asymmetric unit (ASU - Figure S44). Molecules barycenter lay on crystallographic inversion centers. Only **1•TFA** polymorph  $\beta$  crystal form bears a complete molecular entity in the ASU. TPDO diimide cores are almost flat (distance of core atoms from the mean plane are  $d < 0.18 \text{ \AA}$ ) and perfectly superimposable, with minor dipp side chains rearrangements and negligible differences in bond distances (Figure S45).

All the hydrogens have been placed in calculated positions and protonation state of **1•TFA** molecules have been assigned on the basis of additional experimental evidence reported in this work. Disorder on trifluoroacetate counter ions is consistent with the presence of distributed partial charges.

Crystal packing show extensive hydrophobic interactions with multiple  $\text{CH}\cdots\pi$  contacts but poor  $\pi\cdots\pi$  stacking (closer ring centroids at  $d_{\pi\cdots\pi} > 4.3 \text{ \AA}$ , with  $\sim 4.5 \text{ \AA}$  slippage) due to steric hindrance of dipp groups. Free spaces available among phenoxazine diimide cores are filled up by solvent molecules (and counterions for **1•TFA**). Most of these molecules adopt multiple conformations unless they are involved in well oriented polar contacts with heteroatoms of the NDI scaffold. No phase transition has been found for **1** and **1•TFA** polymorph  $\alpha$  crystals upon cooling from 298K to 100K (Table S4).

**Table S4.** Crystallographic data and refinement details for **1** (at 100K and 298K), **1Br** (at 100K), **1•TFA** polymorph  $\alpha$  (at 100K and 298K) and **1•TFA** polymorph  $\beta$  (at 100K).

|                                                                  | <b>1 at 100K</b>                                                                                                                                                              | <b>1 at 298K</b>                                                                                                                                                              | <b>1Br at 100K</b>                                                                                                                    |
|------------------------------------------------------------------|-------------------------------------------------------------------------------------------------------------------------------------------------------------------------------|-------------------------------------------------------------------------------------------------------------------------------------------------------------------------------|---------------------------------------------------------------------------------------------------------------------------------------|
| CCDC Number                                                      | 2383224                                                                                                                                                                       | 2383220                                                                                                                                                                       | 2383219                                                                                                                               |
| Chemical Formula                                                 | C <sub>54</sub> H <sub>44</sub> N <sub>4</sub> O <sub>6</sub><br>· <sup>7</sup> / <sub>4</sub> CHCl <sub>3</sub> · <sup>1</sup> / <sub>3</sub> C <sub>6</sub> H <sub>14</sub> | C <sub>54</sub> H <sub>44</sub> N <sub>4</sub> O <sub>6</sub><br>· <sup>4</sup> / <sub>3</sub> CHCl <sub>3</sub> · <sup>2</sup> / <sub>3</sub> C <sub>6</sub> H <sub>14</sub> | C <sub>54</sub> H <sub>42</sub> Br <sub>2</sub> N <sub>4</sub> O <sub>6</sub><br>·4CHCl <sub>3</sub>                                  |
| Formula weight                                                   | 1073.71 g/mol                                                                                                                                                                 | 1060.43 g/mol                                                                                                                                                                 | 1480.21 g/mol                                                                                                                         |
| Temperature                                                      | 100(2) K                                                                                                                                                                      | 298(2) K                                                                                                                                                                      | 100(2) K                                                                                                                              |
| Wavelength                                                       | 0.620 Å                                                                                                                                                                       | 0.620 Å                                                                                                                                                                       | 0.620 Å                                                                                                                               |
| Crystal system                                                   | Monoclinic                                                                                                                                                                    | Monoclinic                                                                                                                                                                    | Monoclinic                                                                                                                            |
| Space Group                                                      | <i>P</i> 2 <sub>1</sub> / <i>n</i>                                                                                                                                            | <i>P</i> 2 <sub>1</sub> / <i>n</i>                                                                                                                                            | <i>P</i> 2 <sub>1</sub> / <i>n</i>                                                                                                    |
| Unit cell dimensions                                             | <i>a</i> = 14.620(3) Å<br><i>b</i> = 9.322(2) Å<br><i>c</i> = 23.044(5) Å<br>$\alpha$ = 90°<br>$\beta$ = 108.38(3)°<br>$\gamma$ = 90°                                         | <i>a</i> = 14.890(3) Å<br><i>b</i> = 9.385(2) Å<br><i>c</i> = 23.045(5) Å<br>$\alpha$ = 90°<br>$\beta$ = 108.74(3)°<br>$\gamma$ = 90°                                         | <i>a</i> = 12.675(3) Å<br><i>b</i> = 10.178(2) Å<br><i>c</i> = 23.722(5) Å<br>$\alpha$ = 90°<br>$\beta$ = 95.42(3)°<br>$\gamma$ = 90° |
| Volume                                                           | 2980.3(11) Å <sup>3</sup>                                                                                                                                                     | 3049.8(12) Å <sup>3</sup>                                                                                                                                                     | 3046.6(11) Å <sup>3</sup>                                                                                                             |
| <i>Z</i>                                                         | 2                                                                                                                                                                             | 2                                                                                                                                                                             | 2                                                                                                                                     |
| Density (calculated)                                             | 1.196 g·cm <sup>-3</sup>                                                                                                                                                      | 1.155 g·cm <sup>-3</sup>                                                                                                                                                      | 1.614 g·cm <sup>-3</sup>                                                                                                              |
| Absorption coefficient                                           | 0.203 mm <sup>-1</sup>                                                                                                                                                        | 0.164 mm <sup>-1</sup>                                                                                                                                                        | 1.320 mm <sup>-1</sup>                                                                                                                |
| F(000)                                                           | 1115                                                                                                                                                                          | 1109                                                                                                                                                                          | 1488                                                                                                                                  |
| Theta range<br>for data collection                               | 1.7° to 25.5°                                                                                                                                                                 | 1.7° to 25.5°                                                                                                                                                                 | 1.6° to 31.1°                                                                                                                         |
| Index ranges                                                     | -19 ≤ <i>h</i> ≤ 19,<br>-11 ≤ <i>k</i> ≤ 11,<br>-26 ≤ <i>l</i> ≤ 26                                                                                                           | -19 ≤ <i>h</i> ≤ 19,<br>-11 ≤ <i>k</i> ≤ 11,<br>-29 ≤ <i>l</i> ≤ 29                                                                                                           | -21 ≤ <i>h</i> ≤ 21,<br>-16 ≤ <i>k</i> ≤ 16,<br>-39 ≤ <i>l</i> ≤ 39                                                                   |
| Reflections collected                                            | 35022                                                                                                                                                                         | 41241                                                                                                                                                                         | 48017                                                                                                                                 |
| Independent reflections<br>(data with <i>I</i> > 2σ( <i>I</i> )) | 6549 (2706)                                                                                                                                                                   | 6424 (2614)                                                                                                                                                                   | 13188 (6896)                                                                                                                          |
| Resolution                                                       | 0.72 Å                                                                                                                                                                        | 0.78 Å                                                                                                                                                                        | 0.60 Å                                                                                                                                |
| Data multiplicity<br>(max resltn)                                | 4.10 (1.03)                                                                                                                                                                   | 5.95 (6.10)                                                                                                                                                                   | 3.20 (1.93)                                                                                                                           |
| 1/σ( <i>I</i> ) (max resltn)                                     | 6.15 (0.35)                                                                                                                                                                   | 5.18 (0.48)                                                                                                                                                                   | 9.07 (1.18)                                                                                                                           |
| R <sub>merge</sub> (max resltn)                                  | 0.0807 (0.9572)                                                                                                                                                               | 0.0923 (1.041)                                                                                                                                                                | 0.0629 (0.5245)                                                                                                                       |
| Data completeness<br>(max resltn)                                | 78.4% (36.3%)                                                                                                                                                                 | 95.9% (94.8%)                                                                                                                                                                 | 89.5% (72.2%)                                                                                                                         |
| Refinement method                                                | Full-matrix<br>least-squares on F <sup>2</sup>                                                                                                                                | Full-matrix<br>least-squares on F <sup>2</sup>                                                                                                                                | Full-matrix<br>least-squares on F <sup>2</sup>                                                                                        |
| Data / restraints / parameters                                   | 6549 / 37 / 409                                                                                                                                                               | 6424 / 54 / 369                                                                                                                                                               | 13188 / 6 / 391                                                                                                                       |
| Goodness-of-fit on F <sup>2</sup>                                | 1.067                                                                                                                                                                         | 1.097                                                                                                                                                                         | 1.025                                                                                                                                 |
| Δ/σ <sub>max</sub>                                               | 0.002                                                                                                                                                                         | 0.007                                                                                                                                                                         | 0.002                                                                                                                                 |
| Final R indices [ <i>I</i> > 2σ( <i>I</i> )]                     | R <sub>1</sub> = 0.1234<br>wR <sub>2</sub> = 0.2401                                                                                                                           | R <sub>1</sub> = 0.1199<br>wR <sub>2</sub> = 0.2463                                                                                                                           | R <sub>1</sub> = 0.0663<br>wR <sub>2</sub> = 0.1685                                                                                   |
| R indices (all data)                                             | R <sub>1</sub> = 0.2172<br>wR <sub>2</sub> = 0.2728                                                                                                                           | R <sub>1</sub> = 0.1906<br>wR <sub>2</sub> = 0.2772                                                                                                                           | R <sub>1</sub> = 0.1342<br>wR <sub>2</sub> = 0.2019                                                                                   |
| Largest diff. peak and hole                                      | 0.617 and -0.280 eÅ <sup>-3</sup>                                                                                                                                             | 0.510 and -0.233 eÅ <sup>-3</sup>                                                                                                                                             | 0.897 and -0.901 eÅ <sup>-3</sup>                                                                                                     |
| R.M.S. deviation from mean                                       | 0.065 eÅ <sup>-3</sup>                                                                                                                                                        | 0.059 eÅ <sup>-3</sup>                                                                                                                                                        | 0.095 eÅ <sup>-3</sup>                                                                                                                |
| Deviation from mean plane-                                       | 0.021(6) Å                                                                                                                                                                    | 0.021(6) Å                                                                                                                                                                    | 0.046(3) Å                                                                                                                            |

$$R_1 = \frac{\sum ||F_o| - |F_c||}{\sum |F_o|}, wR_2 = \left\{ \frac{\sum [w(F_o^2 - F_c^2)]^2}{\sum [w(F_o^2)]^2} \right\}^{1/2}$$

**Table S4 (cont.).** Crystallographic data and refinement details for **1** (at 100K and 298K), **1Br** (at 100K), **1•TFA** polymorph  $\alpha$  (at 100K and 298K) and **1•TFA** polymorph  $\beta$  (at 100K).

|                                               | <b>1•TFA <math>\alpha</math> at 100K</b>                                                                                                                                             | <b>1•TFA <math>\alpha</math> at 298K</b>                                                                                                                                             | <b>1•TFA <math>\beta</math> at 100K</b>                                                                                                                                               |
|-----------------------------------------------|--------------------------------------------------------------------------------------------------------------------------------------------------------------------------------------|--------------------------------------------------------------------------------------------------------------------------------------------------------------------------------------|---------------------------------------------------------------------------------------------------------------------------------------------------------------------------------------|
| CCDC Number                                   | 2383221                                                                                                                                                                              | 2383222                                                                                                                                                                              | 2383223                                                                                                                                                                               |
| Chemical Formula                              | [C <sub>54</sub> H <sub>45</sub> N <sub>4</sub> O <sub>6</sub> ](C <sub>2</sub> F <sub>3</sub> O <sub>2</sub> )<br>·5C <sub>2</sub> HF <sub>3</sub> O <sub>2</sub> ·H <sub>2</sub> O | [C <sub>54</sub> H <sub>45</sub> N <sub>4</sub> O <sub>6</sub> ](C <sub>2</sub> F <sub>3</sub> O <sub>2</sub> )<br>·5C <sub>2</sub> HF <sub>3</sub> O <sub>2</sub> ·H <sub>2</sub> O | [C <sub>54</sub> H <sub>45</sub> N <sub>4</sub> O <sub>6</sub> ](C <sub>2</sub> F <sub>3</sub> O <sub>2</sub> )<br>·2C <sub>2</sub> HF <sub>3</sub> O <sub>2</sub> ·3H <sub>2</sub> O |
| Formula weight                                | 1547.11 g/mol                                                                                                                                                                        | 1547.11 g/mol                                                                                                                                                                        | 1241.06 g/mol                                                                                                                                                                         |
| Temperature                                   | 100(2) K                                                                                                                                                                             | 298(2) K                                                                                                                                                                             | 100(2) K                                                                                                                                                                              |
| Wavelength                                    | 0.620 Å                                                                                                                                                                              | 0.620 Å                                                                                                                                                                              | 0.620 Å                                                                                                                                                                               |
| Crystal system                                | Triclinic                                                                                                                                                                            | Triclinic                                                                                                                                                                            | Monoclinic                                                                                                                                                                            |
| Space Group                                   | <i>P</i> -1                                                                                                                                                                          | <i>P</i> -1                                                                                                                                                                          | <i>C</i> <i>c</i>                                                                                                                                                                     |
| Unit cell dimensions                          | <i>a</i> = 8.593(2) Å<br><i>b</i> = 9.152(2) Å<br><i>c</i> = 23.901(5) Å<br>$\alpha$ = 88.57(3)°<br>$\beta$ = 83.90(3)°<br>$\gamma$ = 63.20(3)°                                      | <i>a</i> = 8.773(2) Å<br><i>b</i> = 9.322(2) Å<br><i>c</i> = 24.333(5) Å<br>$\alpha$ = 87.25(3)°<br>$\beta$ = 81.84(3)°<br>$\gamma$ = 62.29(3)°                                      | <i>a</i> = 8.483(2) Å<br><i>b</i> = 16.394(3) Å<br><i>c</i> = 41.630(8) Å<br>$\alpha$ = 90°<br>$\beta$ = 90.73(3)°<br>$\gamma$ = 90°                                                  |
| Volume                                        | 1667.7(7) Å <sup>3</sup>                                                                                                                                                             | 1743.5(8) Å <sup>3</sup>                                                                                                                                                             | 5789(2) Å <sup>3</sup>                                                                                                                                                                |
| Z                                             | 1                                                                                                                                                                                    | 1                                                                                                                                                                                    | 4                                                                                                                                                                                     |
| Density (calculated)                          | 1.540 g·cm <sup>-3</sup>                                                                                                                                                             | 1.473 g·cm <sup>-3</sup>                                                                                                                                                             | 1.424 g·cm <sup>-3</sup>                                                                                                                                                              |
| Absorption coefficient                        | 0.104 mm <sup>-1</sup>                                                                                                                                                               | 0.100 mm <sup>-1</sup>                                                                                                                                                               | 0.088 mm <sup>-1</sup>                                                                                                                                                                |
| F(000)                                        | 790                                                                                                                                                                                  | 790                                                                                                                                                                                  | 2568                                                                                                                                                                                  |
| Theta range for data collection               | 2.2° to 29.0°                                                                                                                                                                        | 1.5° to 27.1°                                                                                                                                                                        | 1.7° to 16.8°                                                                                                                                                                         |
| Index ranges                                  | -13 ≤ <i>h</i> ≤ 13,<br>-14 ≤ <i>k</i> ≤ 14,<br>-37 ≤ <i>l</i> ≤ 37                                                                                                                  | -12 ≤ <i>h</i> ≤ 12,<br>-13 ≤ <i>k</i> ≤ 13,<br>-35 ≤ <i>l</i> ≤ 35                                                                                                                  | -7 ≤ <i>h</i> ≤ 7,<br>-15 ≤ <i>k</i> ≤ 15,<br>-38 ≤ <i>l</i> ≤ 38                                                                                                                     |
| Reflections collected                         | 101359                                                                                                                                                                               | 68641                                                                                                                                                                                | 8701                                                                                                                                                                                  |
| Independent reflections (data with I > 2σ(I)) | 13149 (10011)                                                                                                                                                                        | 11050 (7457)                                                                                                                                                                         | 4621 (1878)                                                                                                                                                                           |
| Resolution                                    | 0.64 Å                                                                                                                                                                               | 0.68 Å                                                                                                                                                                               | 1.08 Å                                                                                                                                                                                |
| Data multiplicity (max resltn)                | 7.61 (7.01)                                                                                                                                                                          | 5.93 (5.43)                                                                                                                                                                          | 3.51 (3.57)                                                                                                                                                                           |
| I/σ(I) (max resltn)                           | 14.84 (9.36)                                                                                                                                                                         | 6.40 (2.98)                                                                                                                                                                          | 6.21 (2.35)                                                                                                                                                                           |
| R <sub>merge</sub> (max resltn)               | 0.0879 (0.2443)                                                                                                                                                                      | 0.0796 (0.2886)                                                                                                                                                                      | 0.1441 (0.3835)                                                                                                                                                                       |
| Data completeness (max resltn)                | 98.8% (98.2%)                                                                                                                                                                        | 95.5% (93.4%)                                                                                                                                                                        | 99.5% (99.7%)                                                                                                                                                                         |
| Refinement method                             | Full-matrix<br>least-squares on F <sup>2</sup>                                                                                                                                       | Full-matrix<br>least-squares on F <sup>2</sup>                                                                                                                                       | Full-matrix<br>least-squares on F <sup>2</sup>                                                                                                                                        |
| Data / restraints / parameters                | 13149 / 328 / 548                                                                                                                                                                    | 11050 / 162 / 488                                                                                                                                                                    | 4621 / 224 / 402                                                                                                                                                                      |
| Goodness-of-fit on F <sup>2</sup>             | 0.975                                                                                                                                                                                | 1.100                                                                                                                                                                                | 1.129                                                                                                                                                                                 |
| Δ/σ <sub>max</sub>                            | 0.012                                                                                                                                                                                | 0.029                                                                                                                                                                                | 0.000                                                                                                                                                                                 |
| Final R indices [I > 2σ(I)]                   | R <sub>1</sub> = 0.1316<br>wR <sub>2</sub> = 0.2547                                                                                                                                  | R <sub>1</sub> = 0.1208<br>wR <sub>2</sub> = 0.2872                                                                                                                                  | R <sub>1</sub> = 0.1364<br>wR <sub>2</sub> = 0.2512                                                                                                                                   |
| R indices (all data)                          | R <sub>1</sub> = 0.1483<br>wR <sub>2</sub> = 0.2610                                                                                                                                  | R <sub>1</sub> = 0.1437<br>wR <sub>2</sub> = 0.3000                                                                                                                                  | R <sub>1</sub> = 0.2736<br>wR <sub>2</sub> = 0.3120                                                                                                                                   |
| Largest diff. peak and hole                   | 0.874 and -0.820 eÅ <sup>-3</sup>                                                                                                                                                    | 0.618 and -0.410 eÅ <sup>-3</sup>                                                                                                                                                    | 0.477 and -0.423 eÅ <sup>-3</sup>                                                                                                                                                     |
| R.M.S. deviation from mean                    | 0.103 eÅ <sup>-3</sup>                                                                                                                                                               | 0.086 eÅ <sup>-3</sup>                                                                                                                                                               | 0.086 eÅ <sup>-3</sup>                                                                                                                                                                |
| Deviation from mean plane                     | 0.034(3) Å                                                                                                                                                                           | 0.058(3) Å                                                                                                                                                                           | 0.052(27) Å                                                                                                                                                                           |

$$R_1 = \frac{\sum ||F_o| - |F_c||}{\sum |F_o|}, wR_2 = \left\{ \frac{\sum [w(F_o^2 - F_c^2)]^2}{\sum [w(F_o^2)]^2} \right\}^{1/2}$$

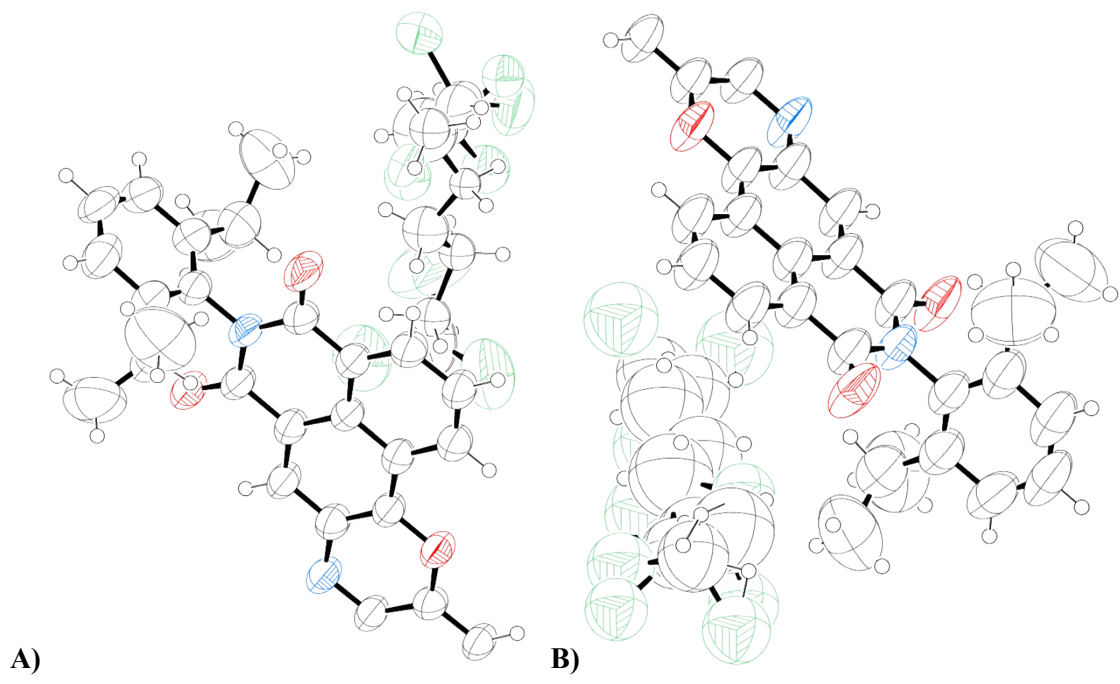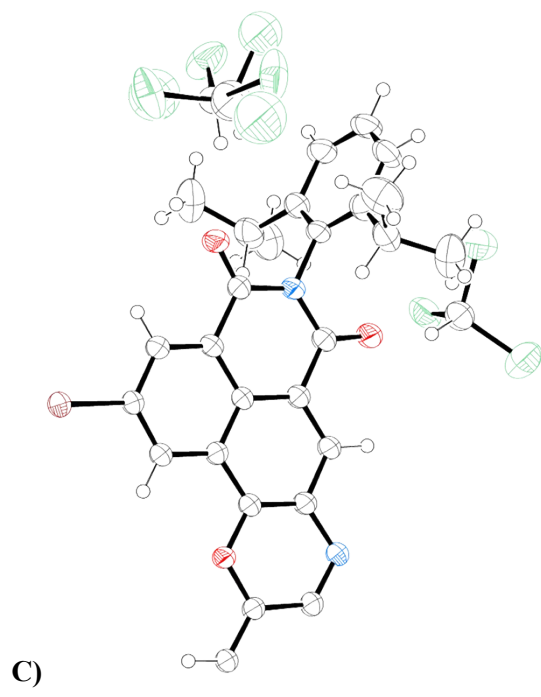

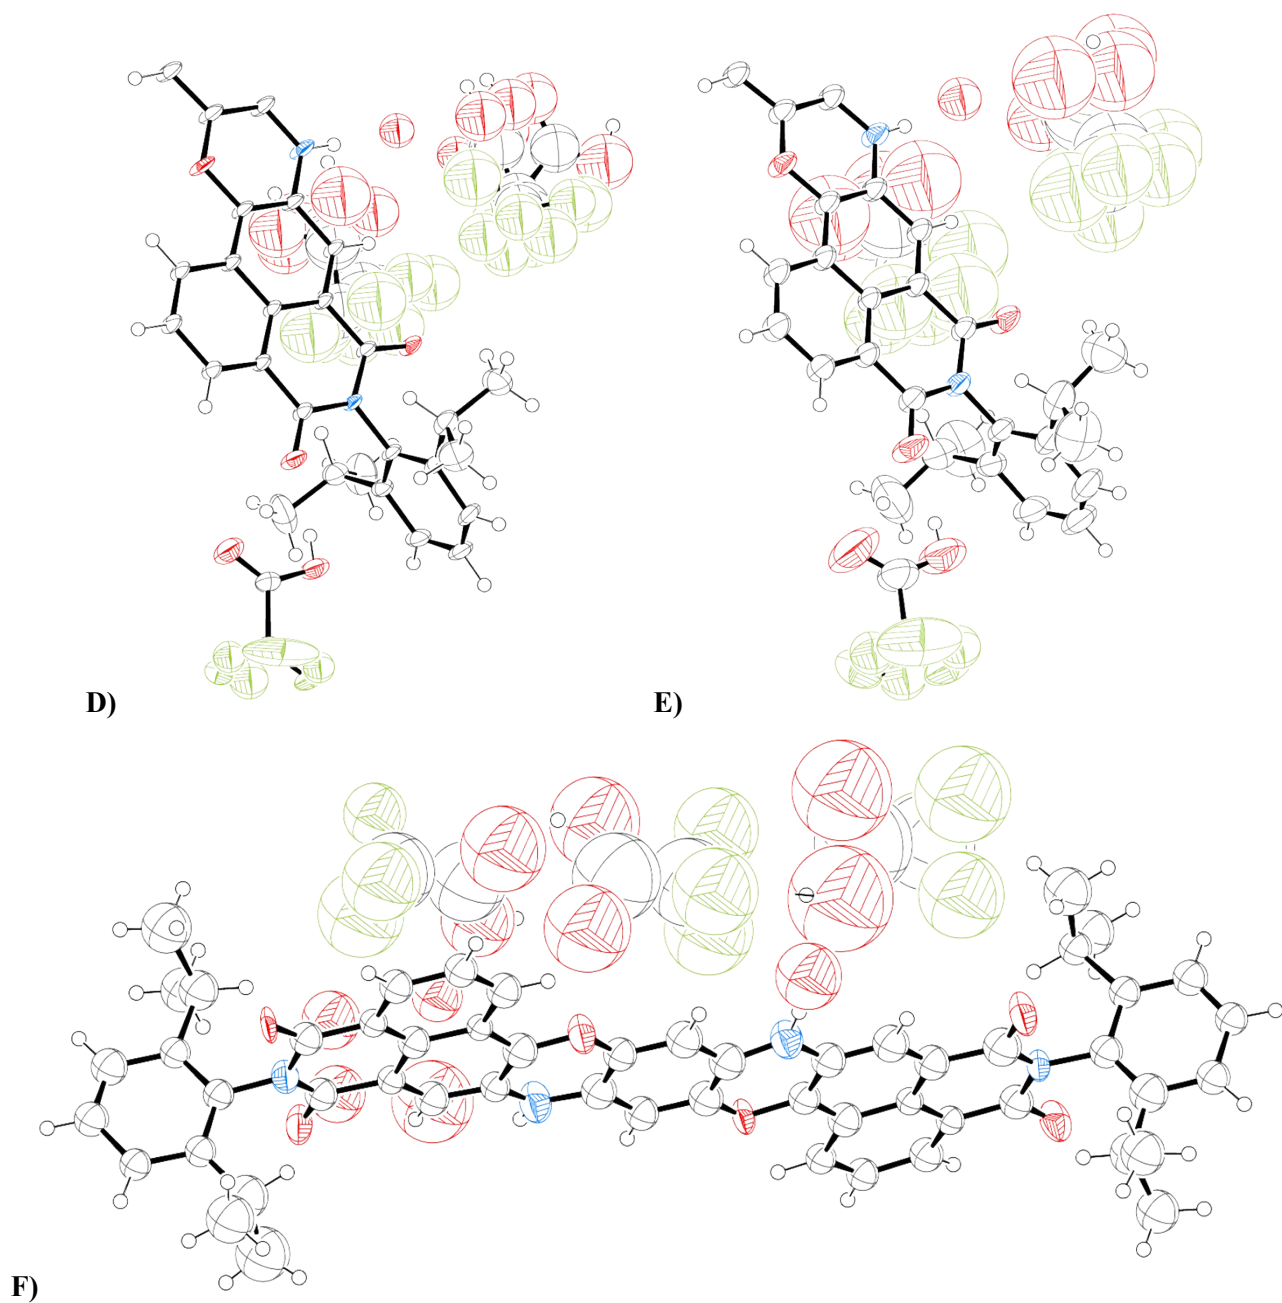

**Figure S44.** Ellipsoids representation of asymmetric unit content (ASU) for (A) **1** at 100K, (B) **1** at 298K, (C) **1Br** at 100K, (D) **1•TFA** polymorph  $\alpha$  at 100K, (E) **1•TFA** polymorph  $\alpha$  at 298K and (F) **1•TFA** polymorph  $\beta$  at 100K (50% probability).

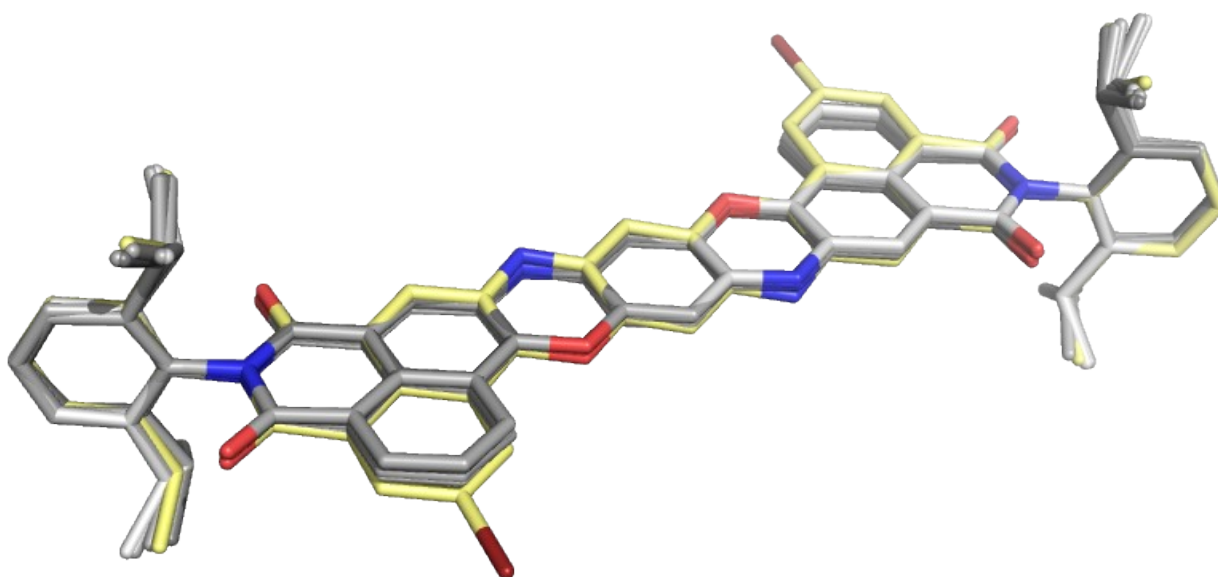

**Figure S45.** Overlap of crystallographically independent TPDO based NDI molecules, showing the equivalent conformations adopted (R.M.S.D. < 0.25 Å – brominated variant is represented with yellow sticks). Hydrogens omitted for clarity.

## References

- 1 F. Vernuccio, R. Vanna, C. Ceconello, A. Bresci, F. Manetti, S. Sorrentino, S. Ghislanzoni, F. Lambertucci, O. Motiño, I. Martins, G. Kroemer, I. Bongarzone, G. Cerullo and D. Polli, *J. Phys. Chem. B*, 2023, **127**, 4733–4745.
- 2 C. H. Camp, Y. J. Lee and M. T. Cicerone, *J. Raman Spectrosc.*, 2016, **47**, 408–415.
- 3 N. F. Fedko and V. F. Anikin, *J. Org. Pharm. Chem.*, 2015, **13**, 12–15.
- 4 J. Réhault, M. Maiuri, A. Oriana and G. Cerullo, *Rev. Sci. Instrum.*, 2014, **85**, 1–11.
- 5 A. Lausi, M. Polentarutti, S. Onesti, J. R. Plaisier, E. Busetto, G. Bais, L. Barba, A. Cassetta, G. Campi, D. Lamba, A. Pifferi, S. C. Mande, D. D. Sarma, S. M. Sharma and G. Paolucci, *Eur. Phys. J. Plus*, 2015, **130**, 1–8.
- 6 J. P. Glusker, *Acta Crystallogr. Sect. D Biol. Crystallogr.*, 2010, **D66**, 125–132.
- 7 J. Agirre, M. Atanasova, H. Bagdonas, C. B. Ballard, A. Baslé, J. Beilsten-Edmands, R. J. Borges, D. G. Brown, J. J. Burgos-Mármol, J. M. Berrisford, P. S. Bond, I. Caballero, L. Catapano, G. Chojnowski, A. G. Cook, K. D. Cowtan, T. I. Croll, J. Debreczeni, N. E. Devenish, E. J. Dodson, T. R. Drevon, P. Emsley, G. Evans, P. R. Evans, M. Fando, J. Foadi, L. Fuentes-Montero, E. F. Garman, M. Gerstel, R. J. Gildea, K. Hatti, M. L. Hekkelman, P. Heuser, S. W. Hoh, M. A. Hough, H. T. Jenkins, E. Jiménez, R. P. Joosten, R. M. Keegan, N. Keep, E. B. Krissinel, P. Kolenko, O. Kovalevskiy, V. S. Lamzin, D. M. Lawson, A. A. Lebedev, A. G. W. Leslie, B. Lohkamp, F. Long,

M. Malý, A. J. McCoy, S. J. McNicholas, A. Medina, C. Millán, J. W. Murray, G. N. Murshudov, R. A. Nicholls, M. E. M. Noble, R. Oeffner, N. S. Pannu, J. M. Parkhurst, N. Pearce, J. Pereira, A. Perrakis, H. R. Powell, R. J. Read, D. J. Rigden, W. Rochira, M. Sammito, F. S. Rodríguez, G. M. Sheldrick, K. L. Shelley, F. Simkovic, A. J. Simpkin, P. Skubak, E. Sobolev, R. A. Steiner, K. Stevenson, I. Tews, J. M. H. Thomas, A. Thorn, J. T. Valls, V. Uski, I. Usón, A. Vagin, S. Velankar, M. Vollmar, H. Walden, D. Waterman, K. S. Wilson, M. D. Winn, G. Winter, M. Wojdyr and K. Yamashita, *Acta Crystallogr. Sect. D Struct. Biol.*, 2023, **79**, 449–461.

8 P. R. Evans and G. N. Murshudov, *Acta Crystallogr. Sect. D Biol. Crystallogr.*, 2013, **69**, 1204–1214.

9 G. M. Sheldrick, *Acta Crystallogr. Sect. A Found. Crystallogr.*, 2015, **71**, 3–8.

10 G. M. Sheldrick, *Acta Crystallogr. Sect. C Struct. Chem.*, 2015, **71**, 3–8.

11 P. Emsley, B. Lohkamp, W. G. Scott and K. Cowtan, *Acta Crystallogr. Sect. D Biol. Crystallogr.*, 2010, **66**, 486–501.

12 L. J. Farrugia, *J. Appl. Crystallogr.*, 2012, **45**, 849–854.

13 C. F. MacRae, I. Sovago, S. J. Cottrell, P. T. A. Galek, P. McCabe, E. Pidcock, M. Platings, G. P. Shields, J. S. Stevens, M. Towler and P. A. Wood, *J. Appl. Crystallogr.*, 2020, **53**, 226–235.

14 Schrodinger, L., L., C., *PyMOL Molecular Graphics System*, 2015, 1, 8.
